# Supplementary material for: First nitrosoproteomic profiling deciphers the cysteine S-nitrosylation involved in multiple metabolic pathways of tea leaves
Source: PubMed Central journal article supplement (PMC6879589; doi:10.1038/s41598-019-54077-2), 2019-11-26
Supplement: 41598_2019_54077_MOESM1_ESM.pdf [file 41598_2019_54077_MOESM1_ESM.pdf]

**First nitrosoproteomic profiling deciphers the cysteine S-nitrosylation  
involved in multiple metabolic pathways of tea leaves**

Chen Qiu<sup>1#</sup>, Jianhao Sun<sup>1#</sup>, Yu Wang<sup>1</sup>, Litao Sun<sup>1</sup>, Hui Xie<sup>1</sup>, Yiqian Ding<sup>1</sup>, Wenjun Qian<sup>1</sup>, Zhaotang Ding<sup>1\*</sup>

1 Tea Research Institute, Qingdao Agricultural University, Qingdao, Shandong, China.

# Equal contributors

\* Corresponding author

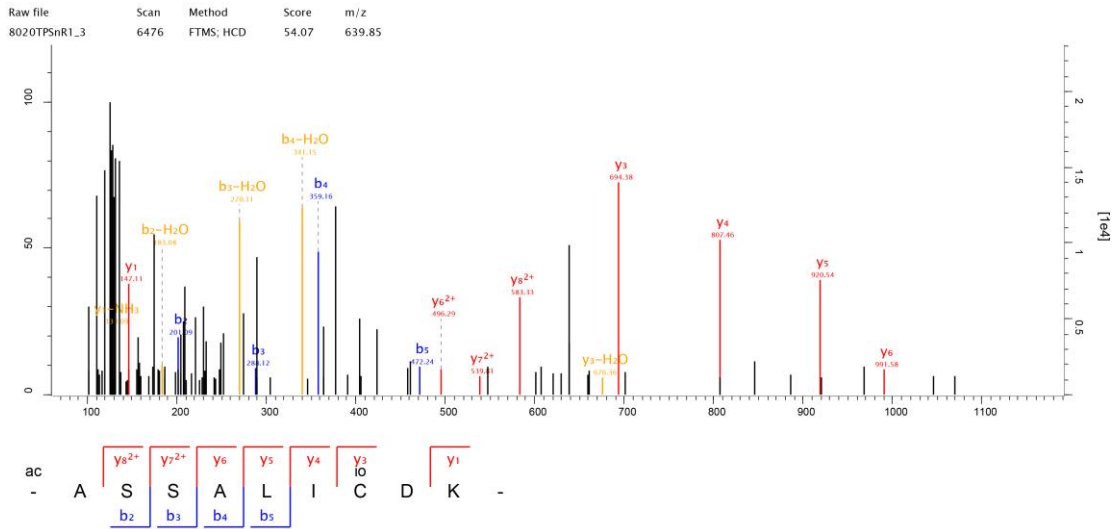

Fig S1: Representative MS/MS spectra of nitrosyl peptides from glycolysis related enzyme GPI (CSA017525.1). S-nitrosyl-peptide ASSALIC(io)DK with S-nitrosylation site at C8 related enzyme GPI.

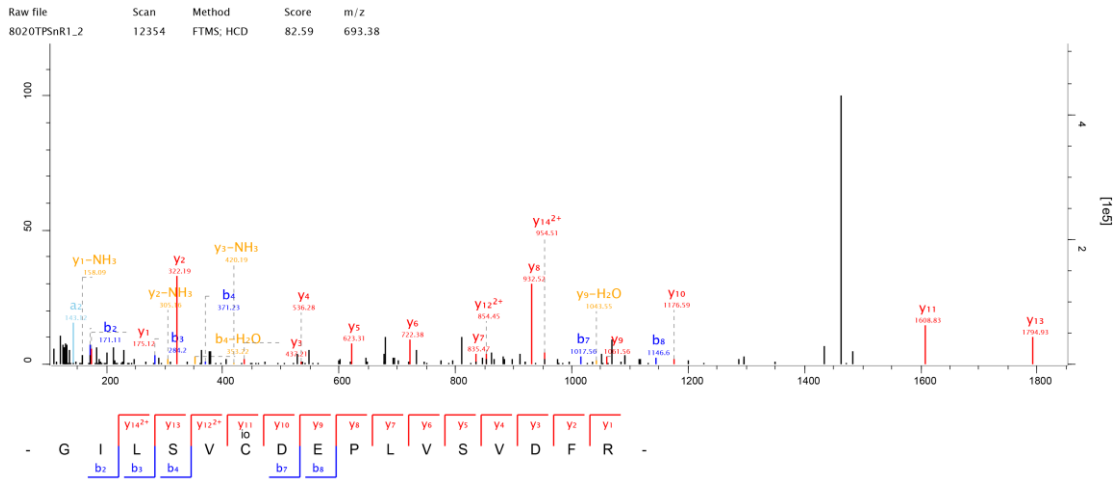

Fig S2: Representative MS/MS spectra of nitrosyl peptides from glycolysis related enzyme GAPA (CSA026796.1). S-nitrosyl-peptide GILSVC(io)DEPLVSDFR with S-nitrosylation site at C346 related enzyme GAPA.

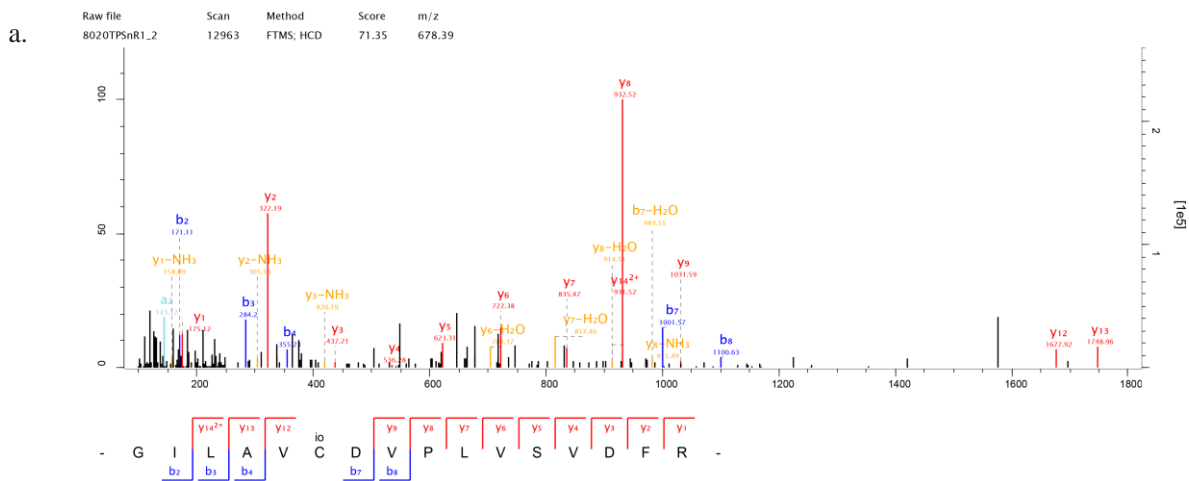

b.

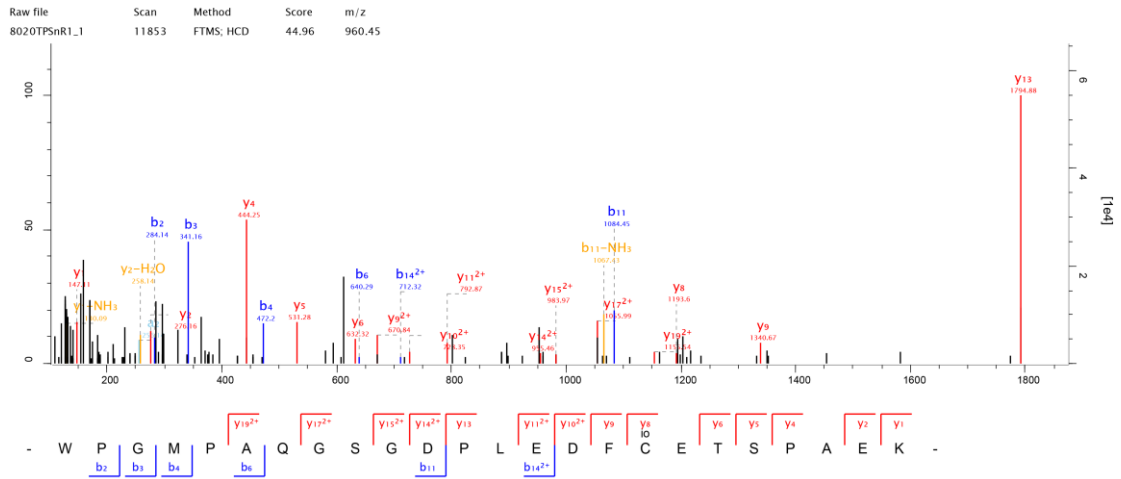

Fig S3: Representative MS/MS spectra of nitrosyl peptides from glycolysis related enzyme GAPB (CSA018950.1). (a) S-nitrosyl-peptide \_GILAVC(io)DVPLVSVDFR\_ with S-nitrosylation site at C367 related enzyme GAPB.

(b) S-nitrosyl-peptide \_WPGMPAQSGDPLEDFC(io)ETSPA EK\_ with S-nitrosylation site at C441 related enzyme GAPB.

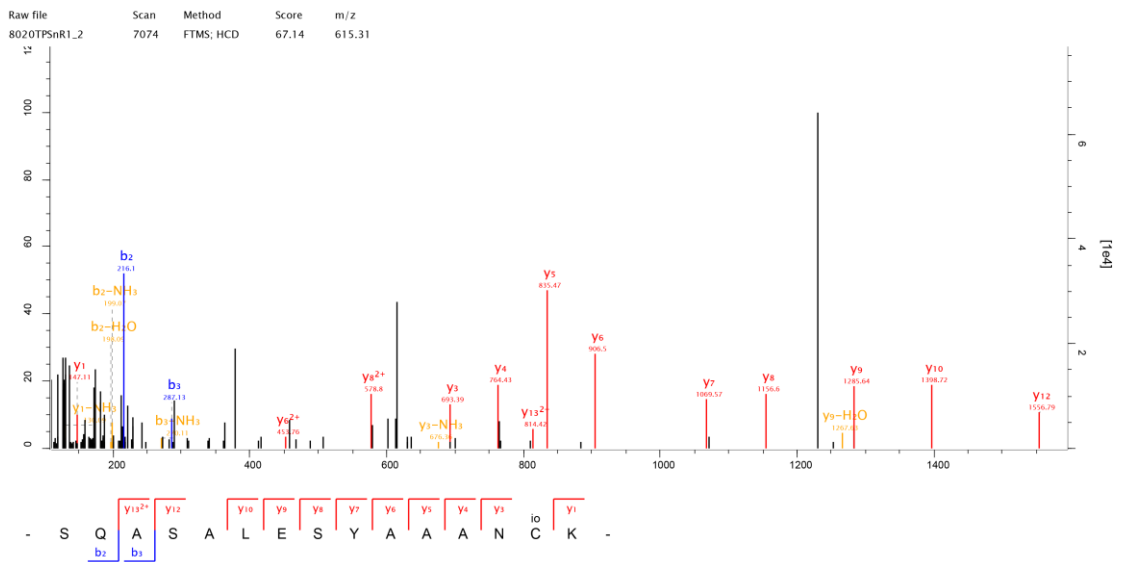

Fig S4: Representative MS/MS spectra of nitrosyl peptides from pyruvate metabolism related enzyme MDH1 (CSA000242.1). S-nitrosyl-peptide \_SQASALESYAANCK\_ with S-nitrosylation site at C125 related enzyme MDH1.

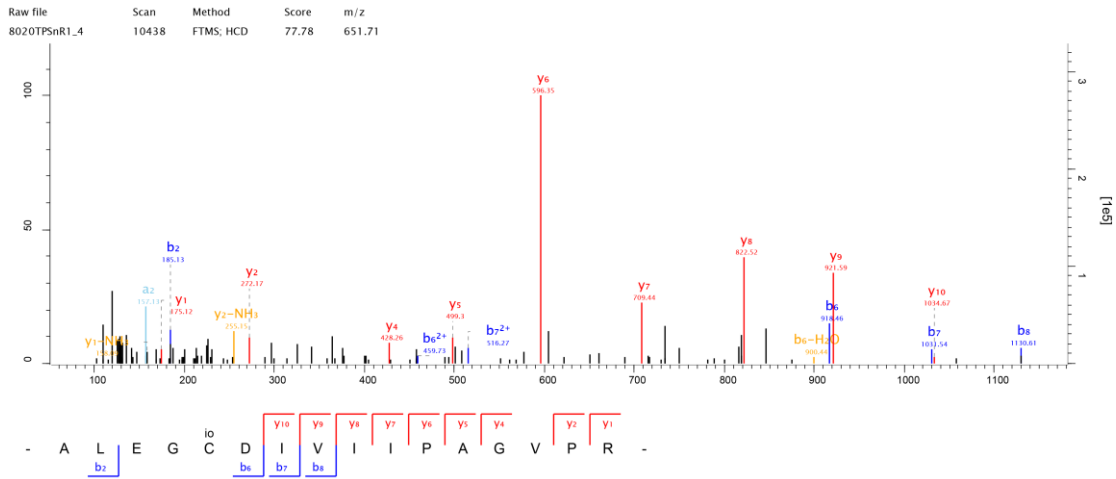

Fig S5: Representative MS/MS spectra of nitrosyl peptides from pyruvate metabolism related enzyme MDH2 (CSA034775.1). S-nitrosyl-peptide ALEGC(io)DIVIIPAGVPR with S-nitrosylation site at C516 related enzyme MDH2.

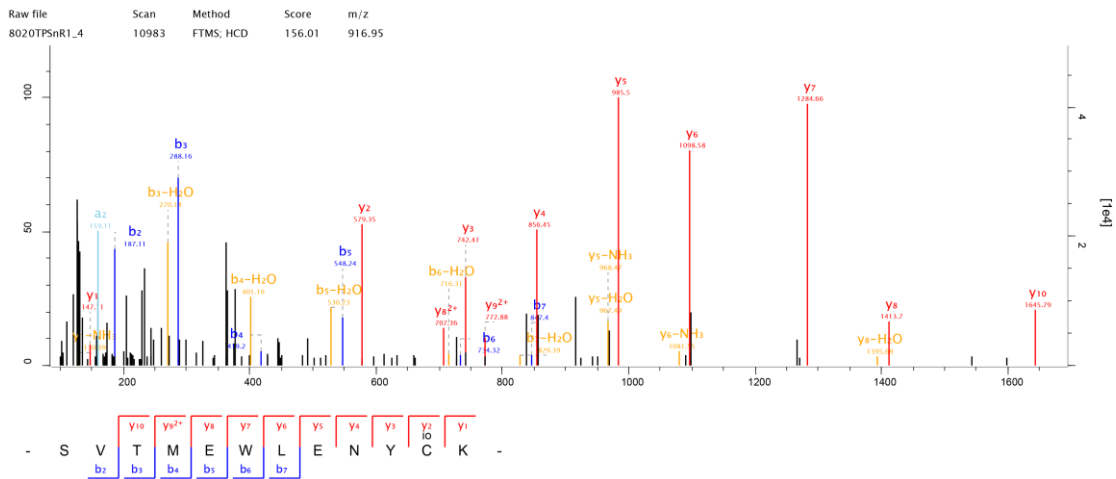

Fig S6: Representative MS/MS spectra of nitrosyl peptides from TCA cycle related enzyme CS (CSA017504.1). S-nitrosyl-peptide SVTMEWLENYK with S-nitrosylation site at C438 related enzyme CS.

a.

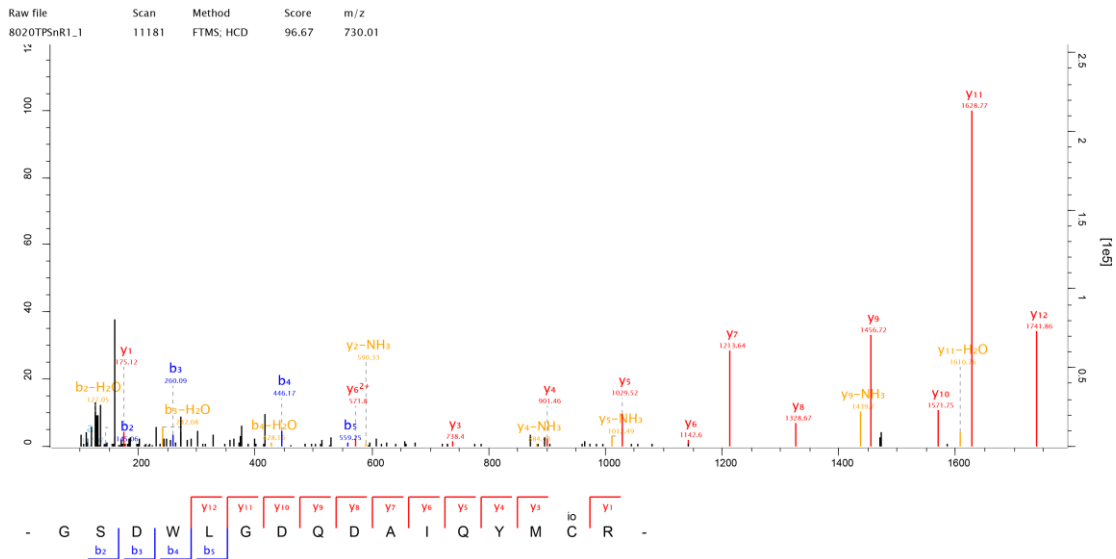

b.

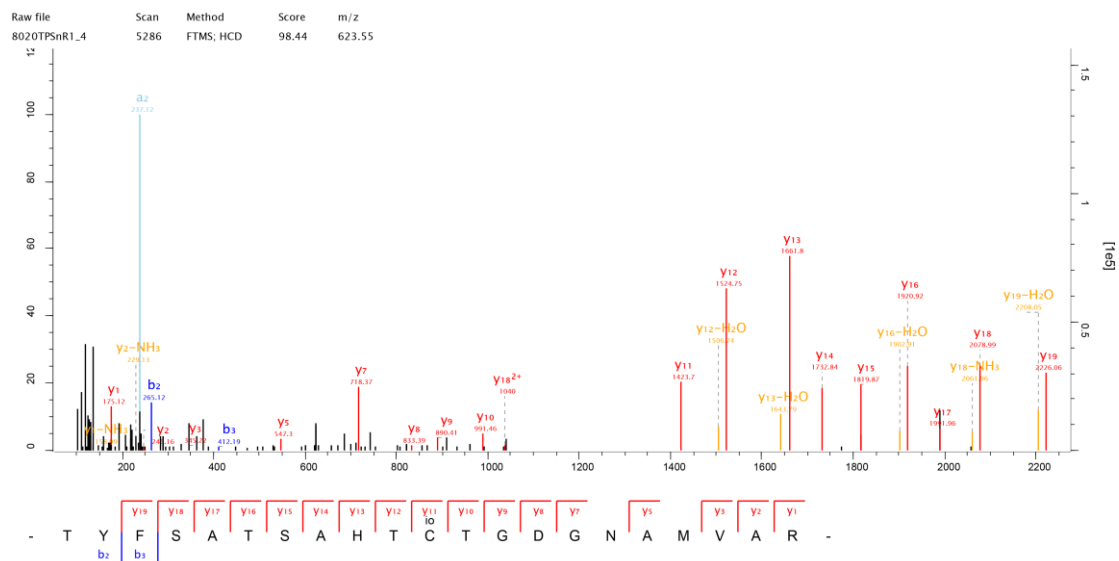

Fig S7: Representative MS/MS spectra of nitrosyl peptides from TCA cycle related enzyme SDHA (CSA009205.1). (a) S-nitrosyl-peptide \_GSDWLGQDAIQYMC(io)R\_ with S-nitrosylation site at C179 related enzyme SDHA. (b) S-nitrosyl-peptide \_TYFSATSATSAHTC(io)TGDGNAMVAR\_ with S-nitrosylation site at C309 related enzyme SDHA.

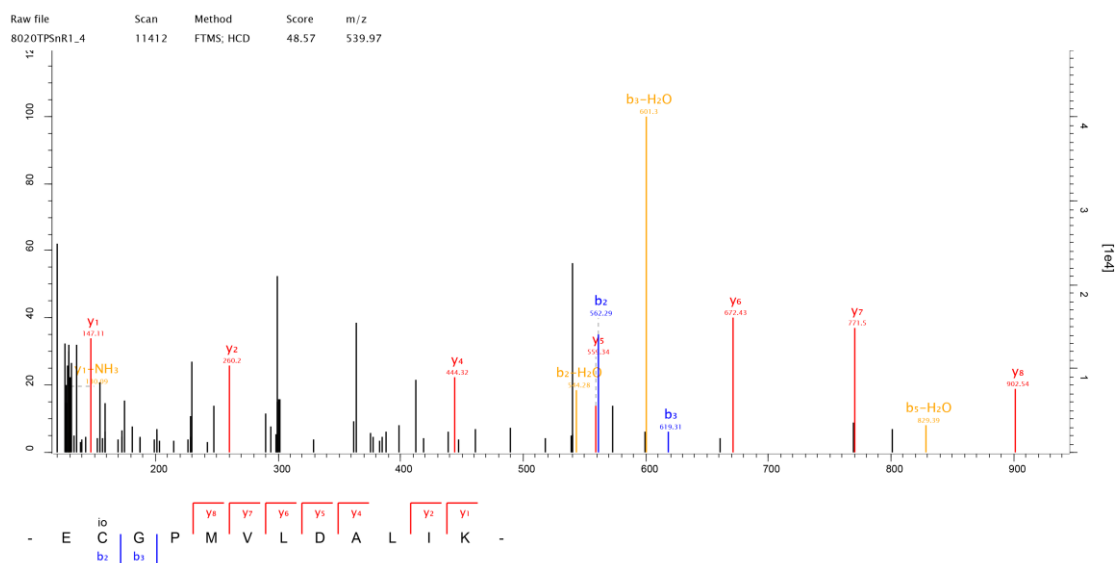

Fig S8: Representative MS/MS spectra of nitrosyl peptides from TCA cycle related enzyme SDHB (CSA004395.1). S-nitrosyl-peptide \_EC(io)GPMVLDALIK\_ with S-nitrosylation site at C74 related enzyme SDHB.

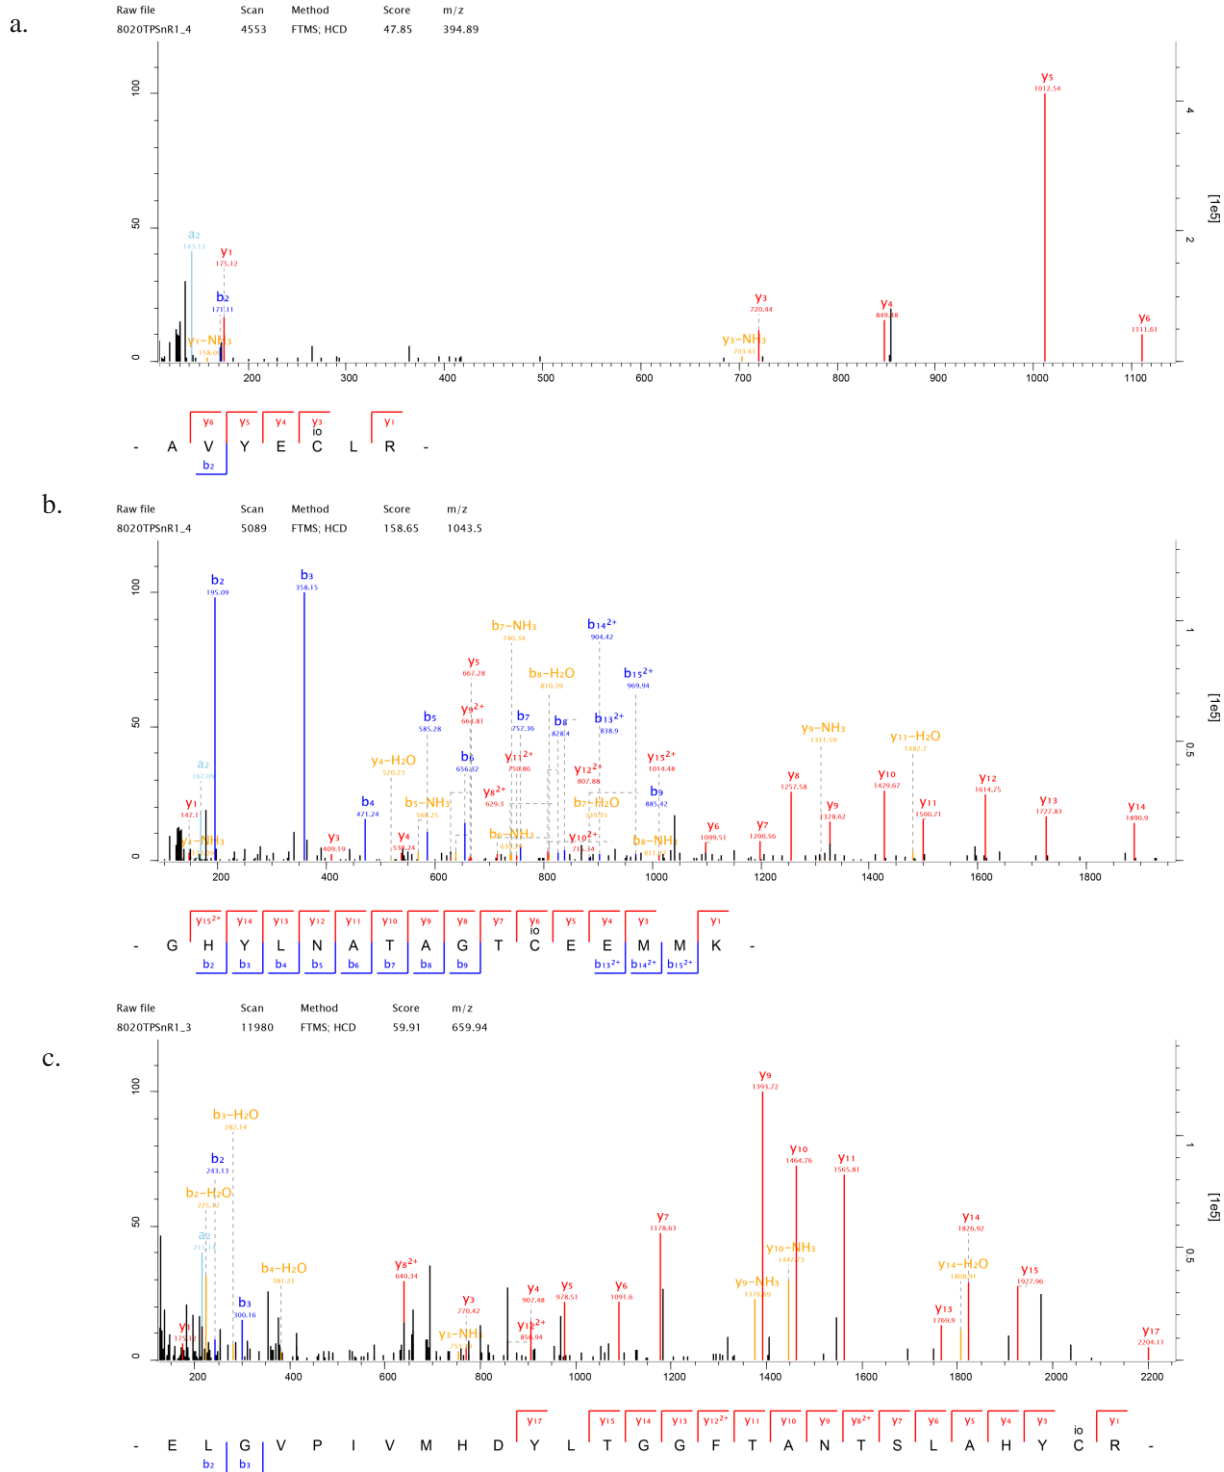

Fig S9: Representative MS/MS spectra of nitrosyl peptides from Calvin cycle related enzyme *rbclL* (CSA036938.1). (a) S-nitrosyl-peptide *\_AVYEC(i)LR\_* with S-nitrosylation site at C207 related enzyme *rbclL*. (b) S-nitrosyl-peptide *\_GHYLNATAGTC(i)EEMMK\_* with S-nitrosylation site at C262 related enzyme *rbclL*. (c) S-nitrosyl-peptide *\_ELGVPIVMHDYLTGGFTANTSLAHC(i)R\_* with S-nitrosylation site at C299 related enzyme *rbclL*.

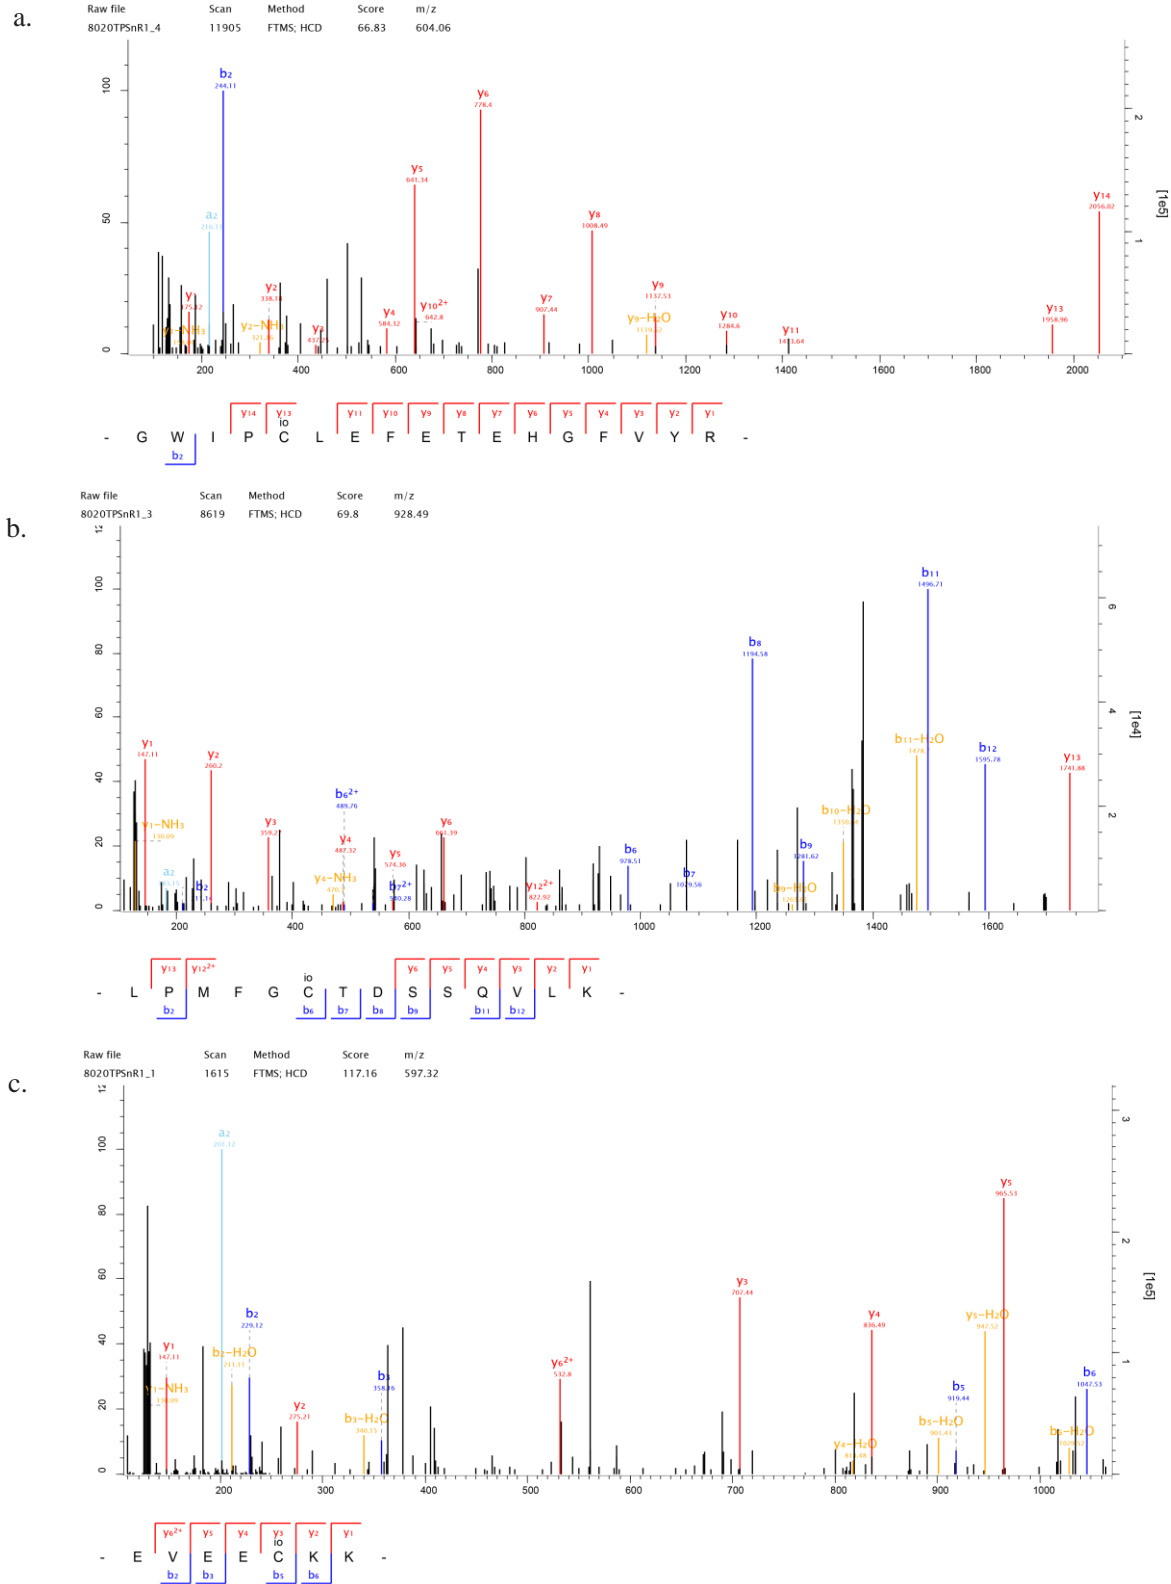

Fig S10: Representative MS/MS spectra of nitrosyl peptides from Calvin cycle related enzyme *rbcS*. (a) S-nitrosyl-peptide \_GWIP(i)LEFETEHEGTFVYR\_ with S-nitrosylation site at C97 related enzyme *rbcS* (CSA020587.1). (b) S-nitrosyl-peptide \_LPMFGC(i)TDSSQVLK\_ with S-nitrosylation site at C130 related enzyme *rbcS* (CSA004763.1). (c) S-nitrosyl-peptide \_EVEEC(i)KK\_ with S-nitrosylation site at C143 related enzyme *rbcS* (CSA004763.1).

a.

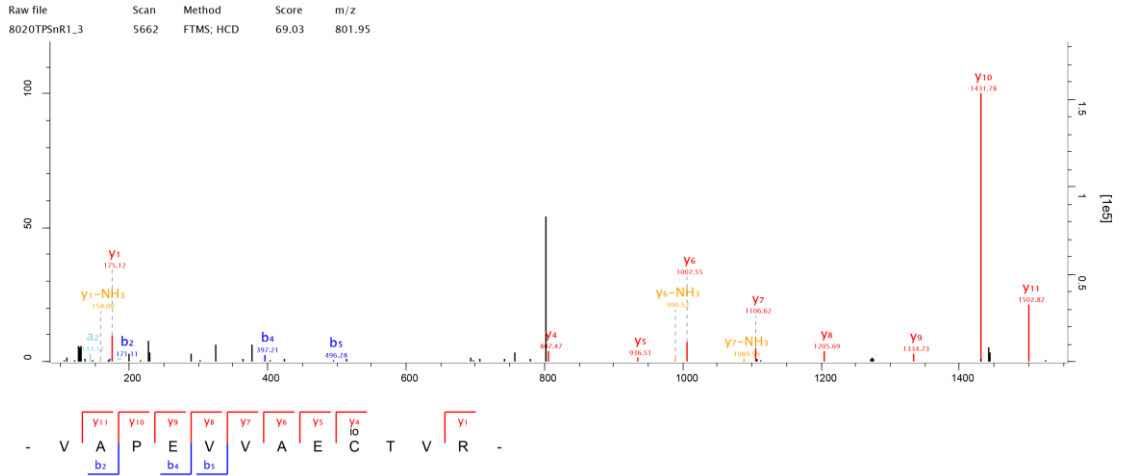

b.

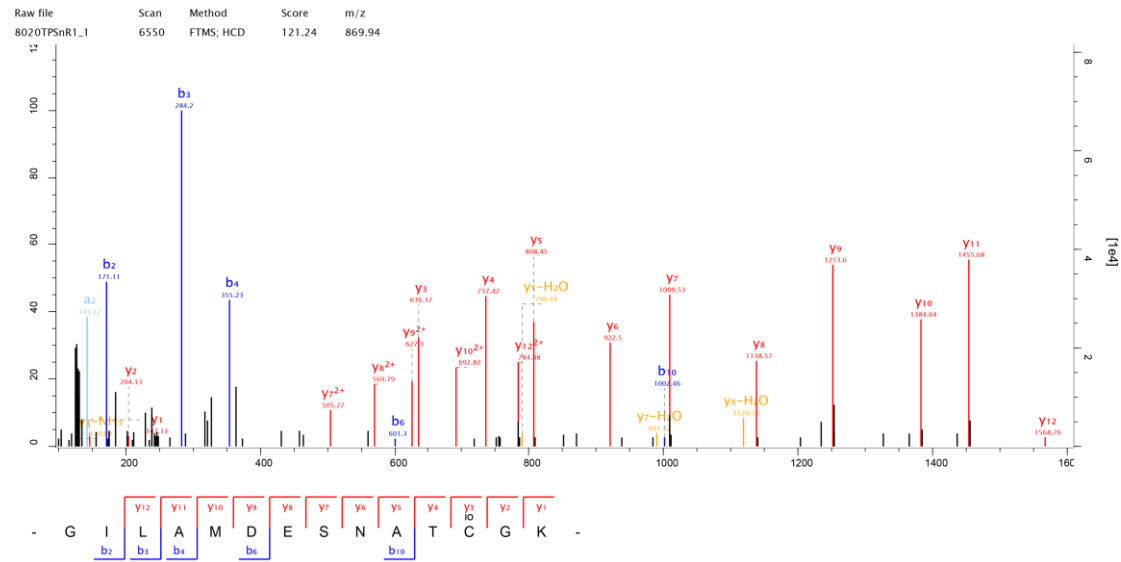

c.

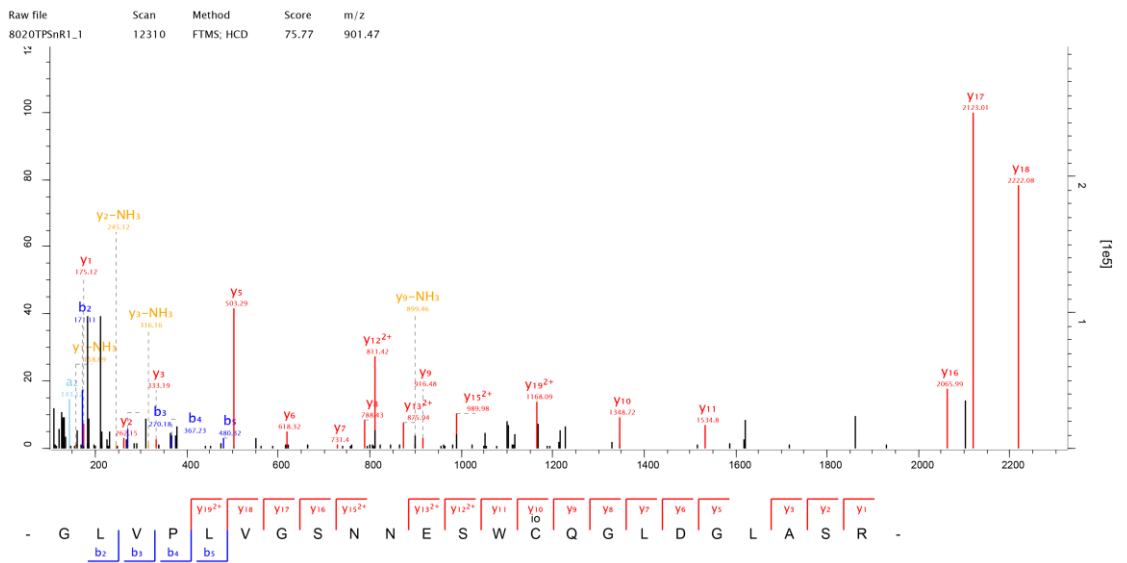



d.

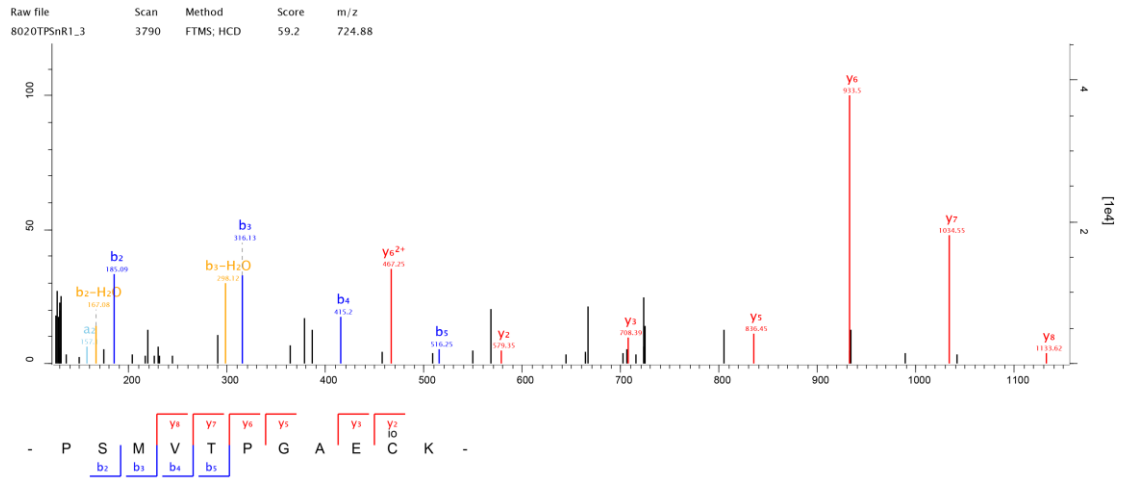

Fig S11: Representative MS/MS spectra of nitrosyl peptides from Calvin cycle related enzyme ALDO. (a) S-nitrosyl-peptide VAPEVVAEC(io)TVR with S-nitrosylation site at C246 related enzyme ALDO (CSA035207.1). (b) S-nitrosyl-peptide GILAMDESNATC(io)GK with S-nitrosylation site at C78 related enzyme ALDO (CSA009966.1). (c) S-nitrosyl-peptide GLVPLVGSNNESWC(io)QGLDGLASR with S-nitrosylation site at C162 related enzyme ALDO (CSA009966.1). (d) S-nitrosyl-peptide PSMVTPGAEC(io)K with S-nitrosylation site at C276 related enzyme ALDO (CSA009966.1).

Table S1. The information for all identified N-sitrolylated proteins.

| Protein accession | Position | Amino acid | Protein description                                                                                                          | Localization | PEP         | Score   | Modified sequence                | Charge | Mass error [ppm] | MS/MS Count |
|-------------------|----------|------------|------------------------------------------------------------------------------------------------------------------------------|--------------|-------------|---------|----------------------------------|--------|------------------|-------------|
| CSA000036.1       | 632      | C          | Pyrophosphate-energized vacuolar membrane proton pump OS-Vigna radiata, ratific PE-1 SV=1*                                   | 1            | 0.000464    | 47.68   | DIPGLMEGTAKPKPYATCTI)YVK         | 3      | 0.83527          | 1           |
| CSA000242.1       | 125      | C          | "Malate dehydrogenase 2, cytoplasmic OS-Arabidopsis thaliana GN=MDH2 PE=1 SV=1"                                              | 1            | 0.000021    | 67.126  | SQASALEYSAAANQI)K                | 3      | 0.82928          | 1           |
| CSA000627.1       | 112      | C          | "Oxygen-evolving enhancer protein 1, chloroplastic OS-Solanum lycopersicum GN=PSBO PE=2 SV=2"                                | 1            | 0.00000264  | 67.439  | GQTGTACQI)PTTEIGVDK              | 2      | 0.080828         | 2           |
| CSA000627.1       | 135      | C          | "Oxygen-evolving enhancer protein 1, chloroplastic OS-Solanum lycopersicum GN=PSBO PE=2 SV=2"                                | 1            | 0.00242     | 67.324  | FCI)LEPTSFYVK                    | 2      | 0.1288           | 2           |
| CSA000795.1       | 67       | C          | "Phosphoribulokinase, chloroplastic OS-Triticum aestivum PE=2 SV=1"                                                          | 1            | 0.00000167  | 97.69   | TVVIGLAAADSGC)IGK                | 2      | -1.0173          | 2           |
| CSA000795.1       | 106      | C          | "Phosphoribulokinase, chloroplastic OS-Triticum aestivum PE=2 SV=1"                                                          | 1            | 1.82E-12    | 59.339  | GGNPDNSITLLSDMTWVIC(I)LDHDHYDLDR | 3      | -0.2245          | 1           |
| CSA000795.1       | 282      | C          | "Phosphoribulokinase, chloroplastic OS-Triticum aestivum PE=2 SV=1"                                                          | 1            | 2.09E-33    | 128.05  | FSPYPLI)DEGETSMWVIC(I)GR         | 2      | -0.1205          | 3           |
| CSA000918.1       | 395      | C          | Glutamate-glyoxylate aminotransferase 2 OS-Arabidopsis thaliana GN=GGAT2 PE=1 SV=1                                           | 1            | 8.89E-15    | 108.47  | NVVCI)I)FTEGTSAGMYSPPQIR         | 2      | -0.2711          | 1           |
| CSA000918.1       | 417      | C          | Glutamate-glyoxylate aminotransferase 2 OS-Arabidopsis thaliana GN=GGAT2 PE=1 SV=1                                           | 1            | 0.00523     | 63.816  | VPDVFYCI)IK                      | 3      | -0.73969         | 1           |
| CSA000918.1       | 226      | C          | Glutamate-glyoxylate aminotransferase 2 OS-Arabidopsis thaliana GN=GGAT2 PE=1 SV=1                                           | 1            | 0.000193    | 49.968  | AMVINGPNPTGGC(I)LSEANLK          | 3      | -0.53357         | 1           |
| CSA000918.1       | 377      | C          | Glutamate-glyoxylate aminotransferase 2 OS-Arabidopsis thaliana GN=GGAT2 PE=1 SV=1                                           | 1            | 0.01035     | 63.816  | IMTDGDNFC(I)YGG                  | 2      | -0.8149          | 1           |
| CSA001213.1       | 133      | C          | "Putative quinone-oxidoreductase homolog, chloroplastic OS-Arabidopsis thaliana GN=At4g13010 PE=1 SV=1"                      | 1            | 0.0000055   | 58.88   | LMNAAYVQC(I)YGGVYAGLK            | 3      | -1.657           | 1           |
| CSA001272.1       | 248      | C          | Catalase isozyme 3 OS-Nicotiana plumbaginifolia GN=CAT3 PE=2 SV=1                                                            | 1            | 0.0421      | 60.019  | C(I)LLDEDAIK                     | 2      | 0.96719          | 1           |
| CSA001272.1       | 86       | C          | Catalase isozyme 3 OS-Nicotiana plumbaginifolia GN=CAT3 PE=2 SV=1                                                            | 1            | 1.77E-08    | 70.837  | GFVEFDTHDHLTCT(I)ADFMIR          | 4      | 1.0214           | 1           |
| CSA001302.1       | 153      | C          | Non-functional NADPH-dependent codonine reductase 2 OS-Papaver somniferum GN=CP92 PE=1 SV=1                                  | 1            | 0.733E-09   | 105.46  | SVVEAMEDC(I)QR                   | 2      | -0.4587          | 2           |
| CSA001627.1       | 87       | C          | Elongation factor 1 alpha OS-Manduca sexta GN=EF1 PE=1 SV=1                                                                  | 1            | 0.00054     | 42.843  | YYCI)TVDTPAGHR                   | 3      | 0.75848          | 1           |
| CSA002128.1       | 167      | C          | "Carbonic anhydrase, chloroplastic OS-Spinacia oleracea PE=1 SV=2"                                                           | 1            | 0.00000581  | 74.141  | CI)VLVSHIVLDFQGEAFVRR            | 3      | -0.59948         | 1           |
| CSA002124.1       | 175      | C          | "Plastid lipid-associated protein 3, chloroplastic OS-Brassica campestris GN=PA3 PE=2 SV=1"                                  | 1            | 0.000257    | 60.167  | C(I)LVDSVYDGLDFGR                | 3      | -0.24695         | 1           |
| CSA002335.1       | 168      | C          | Peptidyl-prolyl cis-trans isomerase OS-Caltharantus roseus GN=PKCR1 PE=1 SV=1                                                | 1            | 0.000813    | 83.852  | TVIADCI)YGLGA                    | 2      | 0.06927          | 1           |
| CSA002602.1       | 40       | C          | Peptidyl-prolyl cis-trans isomerase OS-Caltharantus roseus GN=PKCR1 PE=1 SV=1                                                | 1            | 0.00000632  | 100.19  | ALC(I)YGEK                       | 2      | 0.16011          | 1           |
| CSA002721.2       | 102      | C          | Enolase 1 OS=Hevea brasiliensis GN=ENO1 PE=1 SV=1                                                                            | 1            | 0.00866     | 74.664  | MPTCI)IEGDK                      | 2      | -1.0029          | 2           |
| CSA002721.2       | 287      | C          | Enolase 1 OS=Hevea brasiliensis GN=ENO1 PE=1 SV=1                                                                            | 1            | 1.18E-24    | 91.733  | DPFDDVADFNAMVQQDDTGVNVEWGWC(I)K  | 5      | -0.5825          | 2           |
| CSA002945.1       | 9        | C          | Calcium-binding allergen Bet v 3 OS-Betula pendula GN=BETVH1 PE=1 SV=1                                                       | 1            | 0.000851    | 59.067  | METTAGTPCI)IK                    | 2      | 2.3834           | 1           |
| CSA003060.1       | 382      | C          | "Linoleate 13S-lipoxygenase 2-1, chloroplastic OS-Solanum tuberosum GN=LXG2 PE=1 SV=1"                                       | 1            | 0.000132    | 62.162  | THC(I)TACEPYIIASNR               | 4      | -1.8096          | 1           |
| CSA003060.1       | 516      | C          | Ketol-acid reductoisomerase, chloroplastic OS-Solanum tuberosum GN=AHRI PE=1 SV=1                                            | 1            | 0.000418    | 57.434  | GVSEFMVDC(I)STTAR                | 3      | 0.1165           | 1           |
| CSA003221.2       | 324      | C          | Elongation factor 1 gamma OS-Prunus avium PE=2 SV=1                                                                          | 1            | 4.12E-08    | 66.893  | GFWDMDYDEPGYSLVDYDK              | 3      | 0.58082          | 2           |
| CSA003654.1       | 30       | C          | "Ferredoxin-dependent glutamate synthase, chloroplastic OS-Spinacia oleracea GN=FdOGAT PE=1 SV=3"                            | 1            | 0.000026    | 52.185  | EPTFC(I)MGDDP)LLASLQSK           | 3      | 0.52279          | 1           |
| CSA003658.1       | 175      | C          | "Ribulose biphosphate carboxylase oxygenase activase 1, chloroplastic OS-Larrea tridentata GN=RCA1 PE=1 SV=1"                | 1            | 2.2E-14     | 75.956  | AAQQVHPVPEGG(I)DPVATFNDFPTAR     | 3      | -0.56842         | 1           |
| CSA003662.1       | 475      | C          | "Ribulose biphosphate carboxylase oxygenase activase 2, chloroplastic OS-Larrea tridentata GN=RCA2 PE=2 SV=1"                | 1            | 0.0106      | 66.19   | SFCQ(I)JELVFAK                   | 2      | 0.28823          | 2           |
| CSA003818.1       | 169      | C          | "Rhodanese-like domain-containing protein 9, chloroplastic OS-Arabidopsis thaliana GN=STR9 PE=2 SV=1"                        | 1            | 0.00692     | 48.24   | LLLVCI)IOEJGR                    | 3      | -0.2083          | 1           |
| CSA003990.1       | 156      | C          | Uncharacterized protein                                                                                                      | 1            | 0.000673    | 64.82   | C(I)JVLGYLEAIR                   | 3      | -0.061532        | 1           |
| CSA004085.1       | 159      | C          | ADP-ribosylation factor 1 OS-Oryza sativa subsp. japonica GN=Oat1g0813400 PE=2 SV=3                                          | 1            | 7.15E-26    | 97.676  | HWVYQST(CI)ATSGEGLYEGLDLWSLNNIAK | 4      | 0.23309          | 1           |
| CSA004171.1       | 239      | C          | "LL-aminoglutamate aminotransferase, chloroplastic OS-Arabidopsis thaliana GN=DAP PE=1 SV=1"                                 | 1            | 0.000113    | 47.027  | TDVIF(CI)SPNNPTGSAATR            | 3      | 0.47932          | 1           |
| CSA004197.1       | 284      | C          | Probable galactosylsucrose galactosyltransferase 5 OS-Arabidopsis thaliana GN=RFS5 PE=1 SV=1                                 | 1            | 0.00506     | 50.353  | TSAGEQMPIC(I)R                   | 3      | -0.5573          | 1           |
| CSA004395.1       | 74       | C          | "Succinate dehydrogenase [ubiquinone] iron-sulfur subunit 2, mitochondrial OS-Arabidopsis thaliana GN=SDH2 PE=1 SV=2"        | 1            | 0.00332     | 48.568  | EC(I)JGPMVLDLALK                 | 3      | 0.37335          | 1           |
| CSA004532.1       | 241      | C          | "Chlorophyll a-b binding protein CP26, chloroplastic OS-Arabidopsis thaliana GN=LHCBS PE=1 SV=1"                             | 1            | 0.00538     | 58.32   | FGAN(CI)KPEAVYFK                 | 2      | -2.0656          | 2           |
| CSA004535.1       | 185      | C          | Uncharacterized protein                                                                                                      | 1            | 0.002626    | 46.216  | GMSC(I)TWDVSEYTDVK               | 3      | 0.74347          | 1           |
| CSA004763.1       | 130      | C          | "Ribulose biphosphate carboxylase small chain, chloroplastic OS-Betula pendula GN=RBCS1 PE=2 SV=1"                           | 1            | 0.0011      | 69.795  | LMFG(CI)JDSOSLVK                 | 2      | -1.038           | 6           |
| CSA004763.1       | 143      | C          | "Ribulose biphosphate carboxylase small chain, chloroplastic OS-Betula pendula GN=RBCS1 PE=2 SV=1"                           | 1            | 1.85E-13    | 117.116 | IEVECK(I)K                       | 2      | -0.08129         | 1           |
| CSA004930.1       | 170      | C          | Flavonone 3-hydroxylase OS-Petroselinum crispum GN=FIT PE=1 SV=1                                                             | 1            | 0.0366      | 60.06   | LMLDCA(I)K                       | 2      | -0.2747          | 1           |
| CSA005033.1       | 90       | C          | S-adenosylmethionine synthase 2 OS-Vitis vinifera GN=MET2 PE=3 SV=1                                                          | 1            | 0.0000032   | 79.837  | TIGFVSDVGLDADNC(I)K              | 3      | 0.71744          | 1           |
| CSA005422.1       | 132      | C          | DEAD-box ATP-dependent RNA helicase 56 OS-Arabidopsis thaliana GN=RH56 PE=1 SV=2                                             | 1            | 0.00925     | 40.516  | ELAYQ(CI)HEFER                   | 3      | 2.8488           | 1           |
| CSA005660.1       | 449      | C          | "Leucine aminopeptidase 2, chloroplastic OS-Arabidopsis thaliana GN=L2 PE=2 SV=2"                                            | 1            | 0.0000492   | 52.52   | LTLADLALYAC(I)NGGVK              | 3      | 0.52291          | 1           |
| CSA005866.1       | 183      | C          | "PGRS-like protein 1A, chloroplastic OS-Arabidopsis thaliana GN=PGRL1A PE=1 SV=1"                                            | 1            | 0.00374     | 66.056  | ILPY(CI)SDIEK                    | 2      | 0.53301          | 2           |
| CSA005966.1       | 80       | C          | Basic secretory protease (Fragments) OS=Boswellia serrata PE=1 SV=1                                                          | 1            | 4.26E-08    | 67.645  | WDQDGYTMTWFDLYC(I)NGJLK          | 3      | -0.08926         | 1           |
| CSA006518.1       | 244      | C          | "Chaperonin CPN60-2, mitochondrial OS-Cucurbita maxima GN=CPN60-2 PE=1 SV=1"                                                 | 1            | 0.000438    | 64.104  | C(I)JLEDPLILYEEK                 | 3      | 0.44573          | 1           |
| CSA006518.1       | 135      | C          | "Chaperonin CPN60-2, mitochondrial OS-Cucurbita maxima GN=CPN60-2 PE=1 SV=1"                                                 | 1            | 0.017       | 44.349  | AFAEGC(I)K                       | 3      | 0.34202          | 1           |
| CSA006839.1       | 412      | C          | "Ribbonucleoside H protein At1g6570 OS=Arabidopsis thaliana GN=At1g6570 PE=3 SV=1"                                           | 1            | 3.33E-10    | 106.116 | C(I)JGEGWC(I)ITTK                | 3      | -0.16391         | 1           |
| CSA006839.1       | 96       | C          | Putative ribonuclease H protein At1g6570 OS=Arabidopsis thaliana GN=At1g6570 PE=3 SV=1                                       | 1            | 0.0146      | 47.082  | C(I)JGEGWC(I)ITTK                | 3      | -0.16391         | 1           |
| CSA006911.1       | 404      | C          | 60S ribosomal protein L32-1 OS=Arabidopsis thaliana GN=RPL32A PE=2 SV=1                                                      | 1            | 0.000278    | 61.11   | TY(CI)IAEHNVSSTQK                | 3      | -0.09083         | 1           |
| CSA007312.1       | 246      | C          | "Alpha-1,4-glucan-protein synthase [UDP-forming] 2 OS-Solanum tuberosum GN=LPTG2 PE=1 SV=1"                                  | 1            | 0.000577    | 66.267  | YDDMVAWG(CI)YTK                  | 3      | 0.41422          | 2           |
| CSA007724.1       | 42       | C          | "Elongation factor Ts, mitochondrial OS-Arabidopsis thaliana GN=EFTS PE=2 SV=1"                                              | 1            | 0.000928    | 83.045  | EETGAGMD(CI)K                    | 2      | 0.34427          | 3           |
| CSA008100.1       | 78       | C          | Uncharacterized protein                                                                                                      | 1            | 0.00237     | 69.812  | SIY(CI)YLEK                      | 2      | 0.84301          | 1           |
| CSA008431.1       | 172      | C          | Serine/threonine protein phosphatase 2A 65 kDa regulatory subunit A beta isoform OS-Arabidopsis thaliana GN=PP2AA2 PE=1 SV=1 | 1            | 0.00175     | 64.04   | SIF(CI)JQDMMPMVIR                | 3      | -1.0094          | 1           |
| CSA008456.1       | 150      | C          | "3-isopropylmalate dehydratase large subunit, chloroplastic OS-Arabidopsis thaliana GN=HIL1 PE=1 SV=1"                       | 1            | 0.00968     | 47.96   | DF(CI)IMEQNK                     | 3      | -0.92432         | 1           |
| CSA008457.1       | 124      | C          | "Theodoxin-like protein CDS292, chloroplastic OS-Arabidopsis thaliana GN=CDS292 PE=1 SV=1"                                   | 1            | 5.85E-10    | 85.937  | TC(I)JGVEFLLVMGDSEIETR           | 3      | -0.87574         | 1           |
| CSA008625.1       | 588      | C          | "Glycine-tRNA ligase, mitochondrial 1 OS=Arabidopsis thaliana GN=At1g29880 PE=1 SV=1"                                        | 1            | 0.00386     | 46.92   | C(I)JTVFPLVQQQVEYVAK             | 3      | -1.5098          | 1           |
| CSA008945.1       | 280      | C          | "RbB10c large subunit-binding protein subunit beta, chloroplastic OS-Arabidopsis thaliana GN=SBH1 PE=1 SV=1"                 | 1            | 2.36E-12    | 113.71  | MAVEFEN(CI)K                     | 2      | -0.12892         | 3           |
| CSA009025.1       | 548      | C          | NADP-dependent malic enzyme OS-Vitis vinifera PE=2 SV=1                                                                      | 1            | 0.000257    | 72.29   | YAES(CI)MYTPNVR                  | 2      | -0.061848        | 3           |
| CSA009251.1       | 309      | C          | "Succinate dehydrogenase [ubiquinone] flavoprotein subunit 1, mitochondrial OS=Arabidopsis thaliana GN=SDH1 PE=1 SV=1"       | 1            | 1.27E-14    | 98.443  | TYFSATSHT(CI)TGDGMNVAR           | 3      | 0.0471           | 2           |
| CSA009282.1       | 178      | C          | "Succinate dehydrogenase [ubiquinone] flavoprotein subunit 1, mitochondrial OS=Arabidopsis thaliana GN=SDH1 PE=1 SV=1"       | 1            | 5.92E-10    | 96.673  | GSMDLGDQADWPCV(I)JR              | 3      | -0.31768         | 1           |
| CSA009282.1       | 178      | C          | Mitochondrial-processing peptidase subunit alpha OS-Solanum tuberosum GN=MPP PE=1 SV=1                                       | 1            | 4.43E-08    | 91.076  | FYFPEVMEILLDC(I)YVR              | 3      | -0.1753          | 1           |
| CSA009361.1       | 231      | C          | Uncharacterized protein                                                                                                      | 1            | 0.0146      | 47.082  | RCC(I)I)TRASK                    | 2      | -3.5597          | 1           |
| CSA009361.1       | 82       | C          | Serine hydroxymethyltransferase 4 OS=Arabidopsis thaliana GN=SHM4 PE=1 SV=1                                                  | 1            | 0.0000196   | 74.141  | YVGNLEDEIENLC(I)R                | 3      | -1.8331          | 1           |
| CSA009966.1       | 276      | C          | "Fructose-biphosphate aldolase 2, chloroplastic OS=Arabidopsis thaliana GN=FB2 PE=1 SV=2"                                    | 1            | 0.000452    | 59.198  | PSMVTGAE(CI)K                    | 2      | 0.91888          | 1           |
| CSA009966.1       | 162      | C          | "Fructose-biphosphate aldolase 2, chloroplastic OS=Arabidopsis thaliana GN=FB2 PE=1 SV=2"                                    | 1            | 4.22E-13    | 75.773  | GVLPIVGSNNESWC(I)QJGLDGLASR      | 3      | -0.1431          | 2           |
| CSA009966.1       | 78       | C          | "Fructose-biphosphate aldolase 2, chloroplastic OS=Arabidopsis thaliana GN=FB2 PE=1 SV=2"                                    | 1            | 5.22E-26    | 121.24  | GILAMESDNTA(CI)QJGK              | 2      | -0.30591         | 5           |
| CSA010160.1       | 485      | C          | "Dihydrolypoic dehydrogenase 1, mitochondrial OS=Arabidopsis thaliana GN=LPD1 PE=1 SV=2"                                     | 1            | 2.8E-17     | 113.99  | TC(I)HAIPTMSEALK                 | 3      | 0.52199          | 5           |
| CSA010323.1       | 385      | C          | Uncharacterized oxidoreductase At4g09670 OS=Arabidopsis thaliana GN=At4g09670 PE=1 SV=1                                      | 1            | 0.00346     | 70.056  | SIDLGFEPVC(I)K                   | 2      | 3.7027           | 1           |
| CSA010519.1       | 159      | C          | "Peroxidoxin Q, chloroplastic OS=Populus jackii GN=PRXQ PE=1 SV=1"                                                           | 1            | 0.000000169 | 67.418  | GKPVVVYFPADETPG(CI)YTK           | 3      | 1.1742           | 1           |
| CSA010519.1       | 113      | C          | "Peroxidoxin Q, chloroplastic OS=Populus jackii GN=PRXQ PE=1 SV=1"                                                           | 1            | 0.000175    | 43.164  | GKPVVVYFPADESPGC(I)YTK           | 4      | 0.50138          | 1           |
| CSA010527.1       | 367      | C          | "Perophthallogen deaminase, chloroplastic OS=Psidium sativum GN=HEMC PE=1 SV=1"                                              | 1            | 0.000515    | 85.963  | AFLEALDGC(I)R                    | 2      | 0.51145          | 1           |
| CSA010862.1       | 92       | C          | Glutamine synthetase cytosolic isozyme 1 OS-Vitis vinifera GN=GS1 PE=2 SV=1                                                  | 1            | 3.88E-09    | 65.184  | GNILVMY(CI)DITYTPGPIPTNK         | 3      | -0.54305         | 2           |
| CSA010875.1       | 137      | C          | "Chlorophyll a-b binding protein CP29.2, chloroplastic OS=Arabidopsis thaliana GN=LHC34.2 PE=1 SV=1"                         | 1            | 0.0051      | 65.292  | FREC(I)JELHGR                    | 4      | 1.1381           | 2           |
| CSA011054.1       | 70       | C          | "Theodoxin A-type, chloroplastic OS=Psidium sativum PE=2 SV=1"                                                               | 1            | 0.000247    | 65.231  | INTDDC(I)SPATEYGR                | 3      | -0.1021          | 1           |
| CSA011328.1       | 219      | C          | "Chlorophyll a-b binding protein 7, chloroplastic OS-Solanum lycopersicum GN=CAB7 PE=3 SV=1"                                 | 1            | 0.00000113  | 66.809  | WADLK(PGCI)YNTDPIPPNPK           | 3      | 0.30881          | 1           |
| CSA011328.1       | 153      | C          | "Chlorophyll a-b binding protein 7, chloroplastic OS-Solanum lycopersicum GN=CAB7 PE=3 SV=1"                                 | 1            | 0.00000127  | 96.113  | NVQSELVHC(I)R                    | 2      | 1.0521           | 2           |
| CSA011363.1       | 44       | C          | Lactylglutathione lyase OS-Oryza sativa subsp. japonica GN=GLY11 PE=1 SV=2                                                   | 1            | 0.0176      | 41.427  | FYTEC(I)JFGMK                    | 3      | -1.0653          | 1           |
| CSA011544.1       | 8        | C          | Glycine-rich RNA-binding protein OS=Daucus carota PE=2 SV=1                                                                  | 1            | 0.00052     | 45.684  | C(I)JGVEFWLATWDDGLSR             | 3      | -1.2094          | 1           |
| CSA011668.1       | 272      | C          | "Glyceralddehyde-3-phosphate dehydrogenase, cytosolic OS=Antirrhinum majus GN=CAP PE=1 SV=1"                                 | 1            | 3.15E-10    | 100.93  | VVLDVHMYANTC(I)K                 | 2      | -0.18415         | 4           |
| CSA011729.1       | 269      | C          | "Allene oxide cyclase, chloroplastic OS-Oryza sativa subsp. japonica GN=AOX PE=1 SV=1"                                       | 1            | 0.0003      | 84.479  | AC(I)JEGASTSFND                  | 2      | -0.31463         | 1           |
| CSA011729.1       | 113      | C          | "Allene oxide cyclase, chloroplastic OS-Oryza sativa subsp. japonica GN=AOX PE=1 SV=1"                                       | 1            | 0.0000972   | 70.874  | VOEL(CI)YVEEMNR                  | 3      | -0.19638</       |             |

Table S2. The information of secondary structures.

| <b>Type</b>           | <b>Non-modified Cys</b> | <b>Modified Cys</b> | <b>P value</b> |
|-----------------------|-------------------------|---------------------|----------------|
| Surface accessibility | 36.65                   | 33.48               | 0.2799         |
| Alpha-helix           | 0.1048                  | 0.1472              | 0.43936        |
| Beta-strand           | 0.0537                  | 0.0581              | 0.47572        |
| Coil                  | 0.8413                  | 0.7947              | 8.92E-02       |

Table S3. The information of functional classification and subcellular localization.

| GO Terms Level 1       | GO Terms Level 2             | No. of Protein | Protein IDs                                                                                                                                                                                                                                                                                                                                                                                                                                                                                                                                                                                                                                                                                                                                                                                                                                                                                                                                                                                                                                                                                                                                                                                                                                                                                                                                                                                                                                     |
|------------------------|------------------------------|----------------|-------------------------------------------------------------------------------------------------------------------------------------------------------------------------------------------------------------------------------------------------------------------------------------------------------------------------------------------------------------------------------------------------------------------------------------------------------------------------------------------------------------------------------------------------------------------------------------------------------------------------------------------------------------------------------------------------------------------------------------------------------------------------------------------------------------------------------------------------------------------------------------------------------------------------------------------------------------------------------------------------------------------------------------------------------------------------------------------------------------------------------------------------------------------------------------------------------------------------------------------------------------------------------------------------------------------------------------------------------------------------------------------------------------------------------------------------|
| Biological Process     | metabolic process            | 114            | CSA003232.1 CSA026821.1 CSA023611.1 CSA027795.1 CSA020605.1 CSA017525.1 CSA009282.1 CSA023566.1 CSA017616.1 CSA034340.1 CSA032553.1 CSA025704.1 CSA034492.1 CSA015823.1 CSA012532.1 CSA032333.1 CSA034422.1 CSA035914.1 CSA024855.1 CSA016736.1 CSA018092.1 CSA008456.1 CSA028748.1 CSA010519.1 CSA001667.1 CSA015603.1 CSA034775.1 CSA033994.1 CSA000242.1 CSA033864.1 CSA024921.1 CSA017654.1 CSA000795.1 CSA009889.1 CSA025110.1 CSA018950.1 CSA029580.1 CSA035327.1 CSA025026.1 CSA030434.1 CSA016043.1 CSA015996.1 CSA003990.1 CSA009205.1 CSA003086.1 CSA007312.1 CSA028496.1 CSA034513.1 CSA017438.1 CSA002712.1 CSA010527.1 CSA035207.1 CSA009025.1 CSA009966.1 CSA012305.1 CSA025613.1 CSA025612.1 CSA006911.1 CSA014226.1 CSA011668.1 CSA034838.1 CSA030124.1 CSA019750.1 CSA026796.1 CSA002602.1 CSA004930.1 CSA008625.1 CSA019996.1 CSA029743.1 CSA004187.1 CSA001302.1 CSA020117.1 CSA036932.1 CSA016186.1 CSA021512.1 CSA036672.1 CSA022347.1 CSA017604.1 CSA034373.1 CSA033261.1 CSA036938.1 CSA002335.1 CSA003654.1 CSA018664.1 CSA031477.1 CSA010160.1 CSA035408.1 CSA001272.1 CSA024857.1 CSA004395.1 CSA018282.1 CSA020098.1 CSA007724.1 CSA013744.1 CSA029723.1 CSA000918.1 CSA010785.1 CSA012055.1 CSA031781.1 CSA030116.1 CSA026696.1 CSA000627.1 CSA036240.1 CSA032885.1 CSA003060.1 CSA024718.1 CSA005660.1 CSA005033.1 CSA017504.1 CSA034381.1 CSA018288.1 CSA011054.1 CSA015987.1 CSA033259.1                         |
|                        | cellular process             | 81             | CSA003232.1 CSA023611.1 CSA008945.1 CSA017525.1 CSA036590.1 CSA023566.1 CSA017616.1 CSA032333.1 CSA034422.1 CSA018092.1 CSA028748.1 CSA035465.1 CSA010519.1 CSA001667.1 CSA015603.1 CSA034775.1 CSA033994.1 CSA000242.1 CSA033864.1 CSA009889.1 CSA026073.1 CSA008457.1 CSA006518.1 CSA030434.1 CSA015996.1 CSA003990.1 CSA009205.1 CSA003086.1 CSA007312.1 CSA028496.1 CSA034513.1 CSA017438.1 CSA002712.1 CSA010527.1 CSA035207.1 CSA028657.1 CSA009025.1 CSA009966.1 CSA012305.1 CSA006911.1 CSA014226.1 CSA025613.1 CSA032664.1 CSA034838.1 CSA019750.1 CSA030124.1 CSA002602.1 CSA008625.1 CSA019996.1 CSA004187.1 CSA029743.1 CSA020117.1 CSA036932.1 CSA002335.1 CSA003654.1 CSA016400.1 CSA018664.1 CSA010160.1 CSA024857.1 CSA035117.1 CSA004395.1 CSA004105.1 CSA020098.1 CSA007724.1 CSA013744.1 CSA010785.1 CSA029723.1 CSA000627.1 CSA026696.1 CSA031781.1 CSA036240.1 CSA032885.1 CSA005033.1 CSA017504.1 CSA013547.1 CSA034381.1 CSA018288.1 CSA011054.1 CSA015987.1 CSA033259.1 CSA013811.1                                                                                                                                                                                                                                                                                                                                                                                                                                     |
|                        | single-organism process      | 77             | CSA027795.1 CSA020605.1 CSA017525.1 CSA023566.1 CSA017616.1 CSA034340.1 CSA000036.1 CSA015823.1 CSA032333.1 CSA034422.1 CSA035914.1 CSA016736.1 CSA002108.1 CSA010519.1 CSA015603.1 CSA034775.1 CSA033994.1 CSA000242.1 CSA009889.1 CSA025110.1 CSA018950.1 CSA008457.1 CSA015996.1 CSA003990.1 CSA009205.1 CSA007312.1 CSA003086.1 CSA028496.1 CSA017438.1 CSA002712.1 CSA035207.1 CSA028657.1 CSA009025.1 CSA009966.1 CSA012305.1 CSA014226.1 CSA025613.1 CSA032664.1 CSA011668.1 CSA034838.1 CSA019750.1 CSA004930.1 CSA026796.1 CSA008625.1 CSA019996.1 CSA004187.1 CSA001302.1 CSA020117.1 CSA036932.1 CSA016186.1 CSA021512.1 CSA033261.1 CSA036938.1 CSA003654.1 CSA016400.1 CSA018664.1 CSA010160.1 CSA031477.1 CSA035408.1 CSA001272.1 CSA024857.1 CSA035117.1 CSA004395.1 CSA004105.1 CSA018282.1 CSA013744.1 CSA010785.1 CSA029723.1 CSA026696.1 CSA030116.1 CSA031781.1 CSA003060.1 CSA032885.1 CSA017504.1 CSA034381.1 CSA018288.1 CSA011054.1                                                                                                                                                                                                                                                                                                                                                                                                                                                                                     |
|                        | biological regulation        | 11             | CSA008457.1 CSA010519.1 CSA000627.1 CSA032664.1 CSA035117.1 CSA004105.1 CSA018288.1 CSA011054.1 CSA016400.1 CSA030920.1 CSA010160.1                                                                                                                                                                                                                                                                                                                                                                                                                                                                                                                                                                                                                                                                                                                                                                                                                                                                                                                                                                                                                                                                                                                                                                                                                                                                                                             |
|                        | response to stimulus         | 8              | CSA035408.1 CSA013547.1 CSA001272.1 CSA018282.1 CSA012305.1 CSA004105.1 CSA032664.1 CSA013811.1                                                                                                                                                                                                                                                                                                                                                                                                                                                                                                                                                                                                                                                                                                                                                                                                                                                                                                                                                                                                                                                                                                                                                                                                                                                                                                                                                 |
|                        | localization                 | 4              | CSA033994.1 CSA036932.1 CSA000036.1 CSA030275.1                                                                                                                                                                                                                                                                                                                                                                                                                                                                                                                                                                                                                                                                                                                                                                                                                                                                                                                                                                                                                                                                                                                                                                                                                                                                                                                                                                                                 |
|                        | other                        | 3              | CSA028657.1 CSA004105.1 CSA032664.1                                                                                                                                                                                                                                                                                                                                                                                                                                                                                                                                                                                                                                                                                                                                                                                                                                                                                                                                                                                                                                                                                                                                                                                                                                                                                                                                                                                                             |
|                        | Cellular Component           | cell           | 36                                                                                                                                                                                                                                                                                                                                                                                                                                                                                                                                                                                                                                                                                                                                                                                                                                                                                                                                                                                                                                                                                                                                                                                                                                                                                                                                                                                                                                              |
| macromolecular complex |                              | 16             | CSA019651.1 CSA029723.1 CSA023611.1 CSA006911.1 CSA000627.1 CSA036240.1 CSA033994.1 CSA030434.1 CSA034381.1 CSA033864.1 CSA034513.1 CSA002712.1 CSA020098.1 CSA033259.1 CSA030275.1 CSA030920.1                                                                                                                                                                                                                                                                                                                                                                                                                                                                                                                                                                                                                                                                                                                                                                                                                                                                                                                                                                                                                                                                                                                                                                                                                                                 |
| organelle              |                              | 10             | CSA011729.1 CSA028657.1 CSA023611.1 CSA014226.1 CSA006911.1 CSA036240.1 CSA022360.1 CSA033994.1 CSA030434.1 CSA020098.1                                                                                                                                                                                                                                                                                                                                                                                                                                                                                                                                                                                                                                                                                                                                                                                                                                                                                                                                                                                                                                                                                                                                                                                                                                                                                                                         |
| membrane               |                              | 9              | CSA000036.1 CSA014226.1 CSA000627.1 CSA033994.1 CSA033864.1 CSA031259.1 CSA028496.1 CSA030275.1 CSA033259.1                                                                                                                                                                                                                                                                                                                                                                                                                                                                                                                                                                                                                                                                                                                                                                                                                                                                                                                                                                                                                                                                                                                                                                                                                                                                                                                                     |
| Molecular Function     | catalytic activity           | 116            | CSA026821.1 CSA004197.1 CSA027795.1 CSA011928.1 CSA009367.1 CSA020605.1 CSA017525.1 CSA009282.1 CSA023566.1 CSA017616.1 CSA034340.1 CSA032553.1 CSA000036.1 CSA034492.1 CSA015823.1 CSA012532.1 CSA032333.1 CSA034422.1 CSA035914.1 CSA024855.1 CSA016736.1 CSA002108.1 CSA018092.1 CSA028748.1 CSA010519.1 CSA001667.1 CSA015603.1 CSA034775.1 CSA033994.1 CSA000242.1 CSA024921.1 CSA017654.1 CSA000795.1 CSA009889.1 CSA025110.1 CSA018950.1 CSA029580.1 CSA035327.1 CSA026411.1 CSA025026.1 CSA013010.1 CSA015996.1 CSA003990.1 CSA009205.1 CSA003086.1 CSA007312.1 CSA010323.1 CSA028496.1 CSA034513.1 CSA017438.1 CSA002712.1 CSA031127.1 CSA010527.1 CSA035207.1 CSA009025.1 CSA009966.1 CSA012305.1 CSA025613.1 CSA025612.1 CSA014226.1 CSA011668.1 CSA034838.1 CSA019750.1 CSA018159.1 CSA026796.1 CSA002602.1 CSA004930.1 CSA028285.1 CSA008625.1 CSA019996.1 CSA029743.1 CSA004187.1 CSA020117.1 CSA001302.1 CSA011729.1 CSA016186.1 CSA021512.1 CSA036672.1 CSA022347.1 CSA017604.1 CSA034373.1 CSA036476.1 CSA033261.1 CSA036938.1 CSA002335.1 CSA003654.1 CSA018664.1 CSA031477.1 CSA010160.1 CSA035408.1 CSA001272.1 CSA022831.1 CSA011363.1 CSA024857.1 CSA035117.1 CSA004395.1 CSA018282.1 CSA013744.1 CSA000918.1 CSA010785.1 CSA012055.1 CSA031781.1 CSA030116.1 CSA026696.1 CSA032885.1 CSA003060.1 CSA024718.1 CSA005660.1 CSA005033.1 CSA017504.1 CSA034381.1 CSA034927.1 CSA018288.1 CSA011054.1 CSA015987.1 CSA017430.1 |
|                        | binding                      | 87             | CSA003232.1 CSA008945.1 CSA027795.1 CSA011928.1 CSA019797.1 CSA020605.1 CSA036590.1 CSA022661.1 CSA009282.1 CSA023566.1 CSA003658.1 CSA015823.1 CSA035044.1 CSA032333.1 CSA011544.1 CSA030616.1 CSA002108.1 CSA018092.1 CSA005422.1 CSA028748.1 CSA035465.1 CSA001667.1 CSA033994.1 CSA024921.1 CSA035382.1 CSA000795.1 CSA009889.1 CSA018950.1 CSA030920.1 CSA029580.1 CSA026411.1 CSA026073.1 CSA006518.1 CSA016043.1 CSA002945.1 CSA009205.1 CSA028496.1 CSA002712.1 CSA031127.1 CSA028657.1 CSA009025.1 CSA012305.1 CSA014226.1 CSA025613.1 CSA032664.1 CSA011668.1 CSA026796.1 CSA008625.1 CSA028285.1 CSA019996.1 CSA029266.1 CSA004187.1 CSA036932.1 CSA016186.1 CSA033261.1 CSA036938.1 CSA016400.1 CSA018664.1 CSA031477.1 CSA010160.1 CSA035408.1 CSA001272.1 CSA011363.1 CSA022360.1 CSA004395.1 CSA004105.1 CSA018282.1 CSA007724.1 CSA019651.1 CSA013744.1 CSA000918.1 CSA036936.1 CSA031781.1 CSA000627.1 CSA003662.1 CSA026696.1 CSA003060.1 CSA005660.1 CSA005033.1 CSA013547.1 CSA034381.1 CSA034927.1 CSA015987.1 CSA017430.1 CSA033259.1 CSA008431.1 CSA013811.1                                                                                                                                                                                                                                                                                                                                                             |
|                        | antioxidant activity         | 6              | CSA035408.1 CSA001272.1 CSA018288.1 CSA018282.1 CSA012305.1 CSA010519.1                                                                                                                                                                                                                                                                                                                                                                                                                                                                                                                                                                                                                                                                                                                                                                                                                                                                                                                                                                                                                                                                                                                                                                                                                                                                                                                                                                         |
|                        | structural molecule activity | 4              | CSA030434.1 CSA006911.1 CSA036240.1 CSA020098.1                                                                                                                                                                                                                                                                                                                                                                                                                                                                                                                                                                                                                                                                                                                                                                                                                                                                                                                                                                                                                                                                                                                                                                                                                                                                                                                                                                                                 |
|                        | electron carrier activity    | 3              | CSA022661.1 CSA035117.1 CSA004395.1                                                                                                                                                                                                                                                                                                                                                                                                                                                                                                                                                                                                                                                                                                                                                                                                                                                                                                                                                                                                                                                                                                                                                                                                                                                                                                                                                                                                             |
|                        | other                        | 3              | CSA033994.1 CSA000036.1 CSA030920.1                                                                                                                                                                                                                                                                                                                                                                                                                                                                                                                                                                                                                                                                                                                                                                                                                                                                                                                                                                                                                                                                                                                                                                                                                                                                                                                                                                                                             |

| Subcellular Location     | No. of Protein | Protein IDs                                                                                                                                                                                                                                                                                                                                                                                                                                                                                                                                                                                                                                                                                                                                                                                                                                                                                                                                                                                           |
|--------------------------|----------------|-------------------------------------------------------------------------------------------------------------------------------------------------------------------------------------------------------------------------------------------------------------------------------------------------------------------------------------------------------------------------------------------------------------------------------------------------------------------------------------------------------------------------------------------------------------------------------------------------------------------------------------------------------------------------------------------------------------------------------------------------------------------------------------------------------------------------------------------------------------------------------------------------------------------------------------------------------------------------------------------------------|
| chloroplast              | 79             | CSA019572.1 CSA026821.1 CSA008945.1 CSA002124.1 CSA021957.1 CSA020605.1 CSA022661.1 CSA003658.1 CSA025704.1 CSA034492.1 CSA016104.1 CSA015823.1<br>CSA012532.1 CSA035044.1 CSA006839.1 CSA030616.1 CSA002108.1 CSA018092.1 CSA008456.1 CSA028748.1 CSA010519.1 CSA015603.1 CSA034775.1 CSA033864.1<br>CSA017654.1 CSA000795.1 CSA025110.1 CSA018950.1 CSA026411.1 CSA026073.1 CSA016043.1 CSA014904.1 CSA002945.1 CSA003086.1 CSA010323.1 CSA002712.1<br>CSA031127.1 CSA010527.1 CSA004535.1 CSA009025.1 CSA009966.1 CSA012305.1 CSA006911.1 CSA014226.1 CSA010862.1 CSA034838.1 CSA019750.1 CSA030124.1<br>CSA004532.1 CSA018159.1 CSA005966.1 CSA016587.1 CSA020587.1 CSA026796.1 CSA008625.1 CSA004187.1 CSA036932.1 CSA011729.1 CSA036672.1 CSA020093.1<br>CSA034373.1 CSA004763.1 CSA033261.1 CSA002335.1 CSA010160.1 CSA035117.1 CSA024064.1 CSA018927.1 CSA033307.1 CSA007724.1 CSA013744.1 CSA029723.1<br>CSA000627.1 CSA003662.1 CSA005866.1 CSA005660.1 CSA018288.1 CSA011054.1 CSA033259.1 |
| cytoplasm                | 71             | CSA023611.1 CSA004197.1 CSA027795.1 CSA011928.1 CSA008160.1 CSA019797.1 CSA017525.1 CSA036590.1 CSA023566.1 CSA017616.1 CSA032553.1 CSA035914.1<br>CSA016736.1 CSA005422.1 CSA020775.1 CSA035465.1 CSA003818.1 CSA001667.1 CSA000242.1 CSA024921.1 CSA030920.1 CSA029580.1 CSA035327.1 CSA025026.1<br>CSA030434.1 CSA003990.1 CSA007312.1 CSA028496.1 CSA017438.1 CSA035207.1 CSA011668.1 CSA002602.1 CSA004930.1 CSA029266.1 CSA029743.1 CSA001302.1<br>CSA021512.1 CSA017604.1 CSA021163.1 CSA036938.1 CSA003654.1 CSA016400.1 CSA018664.1 CSA030275.1 CSA031477.1 CSA022831.1 CSA011363.1 CSA024857.1<br>CSA001213.1 CSA018928.1 CSA018282.1 CSA020098.1 CSA019651.1 CSA012055.1 CSA010785.1 CSA000918.1 CSA026696.1 CSA030116.1 CSA031781.1 CSA036240.1<br>CSA003060.1 CSA032885.1 CSA024718.1 CSA017504.1 CSA013547.1 CSA034381.1 CSA015987.1 CSA017430.1 CSA011328.1 CSA013811.1 CSA008431.1                                                                                                    |
| mitochondria             | 17             | CSA025613.1 CSA032664.1 CSA004395.1 CSA033994.1 CSA009367.1 CSA004105.1 CSA019996.1 CSA009282.1 CSA020117.1 CSA016186.1 CSA021473.1 CSA035053.1<br>CSA036936.1 CSA006518.1 CSA015996.1 CSA009205.1 CSA034422.1                                                                                                                                                                                                                                                                                                                                                                                                                                                                                                                                                                                                                                                                                                                                                                                        |
| nucleus                  | 8              | CSA028657.1 CSA008457.1 CSA022360.1 CSA013010.1 CSA011544.1 CSA036476.1 CSA024855.1 CSA035382.1                                                                                                                                                                                                                                                                                                                                                                                                                                                                                                                                                                                                                                                                                                                                                                                                                                                                                                       |
| cytoskeleton             | 6              | CSA005033.1 CSA003232.1 CSA034340.1 CSA034927.1 CSA029934.1 CSA009889.1                                                                                                                                                                                                                                                                                                                                                                                                                                                                                                                                                                                                                                                                                                                                                                                                                                                                                                                               |
| peroxisome               | 3              | CSA035408.1 CSA001272.1 CSA034513.1                                                                                                                                                                                                                                                                                                                                                                                                                                                                                                                                                                                                                                                                                                                                                                                                                                                                                                                                                                   |
| endoplasmic reticulum    | 2              | CSA025612.1 CSA022347.1                                                                                                                                                                                                                                                                                                                                                                                                                                                                                                                                                                                                                                                                                                                                                                                                                                                                                                                                                                               |
| chloroplast,mitochondria | 2              | CSA032333.1 CSA028285.1                                                                                                                                                                                                                                                                                                                                                                                                                                                                                                                                                                                                                                                                                                                                                                                                                                                                                                                                                                               |
| vacuolar membrane        | 1              | CSA000036.1                                                                                                                                                                                                                                                                                                                                                                                                                                                                                                                                                                                                                                                                                                                                                                                                                                                                                                                                                                                           |
| cytoplasm,nucleus        | 1              | CSA028976.1                                                                                                                                                                                                                                                                                                                                                                                                                                                                                                                                                                                                                                                                                                                                                                                                                                                                                                                                                                                           |
| plasma membrane          | 1              | CSA031259.1                                                                                                                                                                                                                                                                                                                                                                                                                                                                                                                                                                                                                                                                                                                                                                                                                                                                                                                                                                                           |

Table S4. The information of GO, KEGG enrichment and protein domain.

| GO Terms Level 1                   | GO Terms Description                                                   | GO Terms Level | GO Terms ID | Mapping | Background | All Mapping | All Background | Fold Enrichment | Fisher's exact test P value | -log10(p value)                                                                                                                                 | Related Protein                                                                                                                                                                                                                                                                                                                                                                                                                                                                                                                                                                                                                                                                                                                                                                                                                                                                                                                                                                                                                                                                                                                                                                                                                                                                                                                                                                                                                                                                                                         |
|------------------------------------|------------------------------------------------------------------------|----------------|-------------|---------|------------|-------------|----------------|-----------------|-----------------------------|-------------------------------------------------------------------------------------------------------------------------------------------------|-------------------------------------------------------------------------------------------------------------------------------------------------------------------------------------------------------------------------------------------------------------------------------------------------------------------------------------------------------------------------------------------------------------------------------------------------------------------------------------------------------------------------------------------------------------------------------------------------------------------------------------------------------------------------------------------------------------------------------------------------------------------------------------------------------------------------------------------------------------------------------------------------------------------------------------------------------------------------------------------------------------------------------------------------------------------------------------------------------------------------------------------------------------------------------------------------------------------------------------------------------------------------------------------------------------------------------------------------------------------------------------------------------------------------------------------------------------------------------------------------------------------------|
| Molecular Function                 | catalytic activity                                                     | 2              | GO:0003824  | 116     | 8737       | 153         | 17667          | 1.53            | 2.90536E-11                 | 10.54                                                                                                                                           | CSA026821.1 CSA004197.1 CSA027795.1 CSA011928.1 CSA009367.1 CSA020605.1 CSA017525.1 CSA009282.1 CSA017616.1 CSA023566.1 CSA034340.1 CSA032553.1 CSA000036.1 CSA034492.1 CSA012532.1 CSA015823.1 CSA032333.1 CSA034422.1 CSA016736.1 CSA035914.1 CSA024855.1 CSA002108.1 CSA018092.1 CSA028748.1 CSA010519.1 CSA001667.1 CSA015603.1 CSA033994.1 CSA034775.1 CSA000242.1 CSA024921.1 CSA009889.1 CSA000795.1 CSA017654.1 CSA018950.1 CSA025110.1 CSA029580.1 CSA035327.1 CSA026411.1 CSA025026.1 CSA013010.1 CSA015996.1 CSA003990.1 CSA009205.1 CSA003086.1 CSA010323.1 CSA007312.1 CSA028496.1 CSA017438.1 CSA034513.1 CSA002712.1 CSA031127.1 CSA010527.1 CSA035207.1 CSA009966.1 CSA012305.1 CSA009025.1 CSA014226.1 CSA025613.1 CSA011668.1 CSA016736.1 CSA003654.1 CSA019750.1 CSA019750.1 CSA034838.1 CSA018159.1 CSA002602.1 CSA004930.1 CSA004331.1 CSA008625.1 CSA022825.1 CSA019996.1 CSA004187.1 CSA029743.1 CSA020117.1 CSA001302.1 CSA011729.1 CSA016186.1 CSA021512.1 CSA033261.1 CSA036938.1 CSA018664.1 CSA003654.1 CSA014775.1 CSA010160.1 CSA035408.1 CSA034381.1 CSA033261.1 CSA036476.1 CSA036938.1 CSA020235.1 CSA003654.1 CSA018664.1 CSA031477.1 CSA010160.1 CSA035408.1 CSA001272.1 CSA022831.1 CSA011363.1 CSA024857.1 CSA035117.1 CSA004395.1 CSA018282.1 CSA013744.1 CSA000918.1 CSA012055.1 CSA010785.1 CSA026696.1 CSA031781.1 CSA030116.1 CSA003060.1 CSA032885.1 CSA024718.1 CSA017504.1 CSA005660.1 CSA005033.1 CSA034381.1 CSA034927.1 CSA018288.1 CSA011054.1 CSA015987.1 CSA017430.1 |
|                                    | cofactor binding                                                       | 3              | GO:0048037  | 23      | 473        | 153         | 17667          | 5.61            | 1.15009E-10                 | 9.94                                                                                                                                            | CSA009025.1 CSA014226.1 CSA025613.1 CSA011668.1 CSA027795.1 CSA024921.1 CSA026796.1 CSA028285.1 CSA009889.1 CSA018950.1 CSA004187.1 CSA016186.1 CSA013744.1 CSA000918.1 CSA031781.1 CSA015823.1 CSA032333.1 CSA009205.1 CSA034927.1 CSA018092.1 CSA017430.1 CSA01127.1 CSA010160.1                                                                                                                                                                                                                                                                                                                                                                                                                                                                                                                                                                                                                                                                                                                                                                                                                                                                                                                                                                                                                                                                                                                                                                                                                                      |
|                                    | oxidoreductase activity                                                | 3              | GO:0016491  | 40      | 1640       | 153         | 17667          | 2.82            | 2.98087E-09                 | 8.53                                                                                                                                            | CSA009025.1 CSA012305.1 CSA014226.1 CSA011668.1 CSA027795.1 CSA034838.1 CSA004930.1 CSA026796.1 CSA020117.1 CSA001302.1 CSA017616.1 CSA016186.1 CSA034340.1 CSA021512.1 CSA015823.1 CSA032333.1 CSA016736.1 CSA003654.1 CSA031477.1 CSA010160.1 CSA035408.1 CSA001272.1 CSA010519.1 CSA035117.1 CSA004395.1 CSA034775.1 CSA000242.1 CSA018282.1 CSA025110.1 CSA018950.1 CSA030116.1 CSA003060.1 CSA013010.1 CSA015996.1 CSA009205.1 CSA018288.1 CSA010323.1 CSA003086.1 CSA011054.1                                                                                                                                                                                                                                                                                                                                                                                                                                                                                                                                                                                                                                                                                                                                                                                                                                                                                                                                                                                                                                     |
|                                    | isomerase activity                                                     | 3              | GO:0016853  | 13      | 218        | 153         | 17667          | 6.89            | 4.11085E-07                 | 6.39                                                                                                                                            | CSA011729.1 CSA024857.1 CSA015603.1 CSA019750.1 CSA033261.1 CSA002602.1 CSA034927.1 CSA035914.1 CSA007312.1 CSA002335.1 CSA017525.1 CSA018092.1 CSA017438.1                                                                                                                                                                                                                                                                                                                                                                                                                                                                                                                                                                                                                                                                                                                                                                                                                                                                                                                                                                                                                                                                                                                                                                                                                                                                                                                                                             |
|                                    | coenzyme binding                                                       | 4              | GO:0050662  | 15      | 315        | 153         | 17667          | 5.5             | 5.87007E-07                 | 6.23                                                                                                                                            | CSA016186.1 CSA009025.1 CSA014226.1 CSA011668.1 CSA031781.1 CSA015823.1 CSA011668.1 CSA027795.1 CSA032333.1 CSA026796.1 CSA009205.1 CSA034927.1 CSA018950.1 CSA017430.1 CSA031127.1 CSA010160.1                                                                                                                                                                                                                                                                                                                                                                                                                                                                                                                                                                                                                                                                                                                                                                                                                                                                                                                                                                                                                                                                                                                                                                                                                                                                                                                         |
|                                    | oxidoreductase activity, acting on the aldehyde or oxo group of donors | 4              | GO:0016903  | 7       | 56         | 153         | 17667          | 14.43           | 8.36578E-06                 | 5.08                                                                                                                                            | CSA016186.1 CSA032333.1 CSA034340.1 CSA026796.1 CSA030116.1 CSA018950.1 CSA011668.1                                                                                                                                                                                                                                                                                                                                                                                                                                                                                                                                                                                                                                                                                                                                                                                                                                                                                                                                                                                                                                                                                                                                                                                                                                                                                                                                                                                                                                     |
|                                    | NAD binding                                                            | 6              | GO:0051287  | 8       | 95         | 153         | 17667          | 9.72            | 1.78258E-05                 | 4.75                                                                                                                                            | CSA016186.1 CSA026796.1 CSA034927.1 CSA009025.1 CSA031781.1 CSA015823.1 CSA018950.1 CSA011668.1                                                                                                                                                                                                                                                                                                                                                                                                                                                                                                                                                                                                                                                                                                                                                                                                                                                                                                                                                                                                                                                                                                                                                                                                                                                                                                                                                                                                                         |
| pyridoxal phosphate binding        | 5                                                                      | GO:0030170     | 8           | 106     | 153        | 17667       | 8.71           | 3.63353E-05     | 4.44                        | CSA013744.1 CSA000918.1 CSA025613.1 CSA024921.1 CSA028285.1 CSA009889.1 CSA018092.1 CSA004187.1                                                 |                                                                                                                                                                                                                                                                                                                                                                                                                                                                                                                                                                                                                                                                                                                                                                                                                                                                                                                                                                                                                                                                                                                                                                                                                                                                                                                                                                                                                                                                                                                         |
| Cellular Component                 | intracellular                                                          | 4              | GO:0005622  | 36      | 2182       | 39          | 4311           | 1.82            | 4.41502E-08                 | 7.36                                                                                                                                            | CSA023611.1 CSA028657.1 CSA014226.1 CSA006911.1 CSA032664.1 CSA008945.1 CSA018159.1 CSA008625.1 CSA036590.1 CSA011729.1 CSA023566.1 CSA033261.1 CSA018664.1 CSA030275.1 CSA028748.1 CSA022360.1 CSA001667.1 CSA033994.1 CSA033864.1 CSA004105.1 CSA020098.1 CSA029580.1 CSA030920.1 CSA007724.1 CSA019651.1 CSA029723.1 CSA000627.1 CSA036240.1 CSA005660.1 CSA006518.1 CSA030434.1 CSA003990.1 CSA034381.1 CSA034513.1 CSA002712.1 CSA033259.1                                                                                                                                                                                                                                                                                                                                                                                                                                                                                                                                                                                                                                                                                                                                                                                                                                                                                                                                                                                                                                                                         |
|                                    | cell                                                                   | 2              | GO:0005623  | 36      | 2336       | 39          | 4311           | 1.7             | 3.95724E-07                 | 6.4                                                                                                                                             | CSA023611.1 CSA028657.1 CSA014226.1 CSA006911.1 CSA032664.1 CSA008945.1 CSA018159.1 CSA008625.1 CSA036590.1 CSA011729.1 CSA023566.1 CSA033261.1 CSA018664.1 CSA030275.1 CSA028748.1 CSA022360.1 CSA001667.1 CSA033994.1 CSA033864.1 CSA004105.1 CSA020098.1 CSA029580.1 CSA030920.1 CSA007724.1 CSA019651.1 CSA029723.1 CSA000627.1 CSA036240.1 CSA005660.1 CSA006518.1 CSA030434.1 CSA003990.1 CSA034381.1 CSA034513.1 CSA002712.1 CSA033259.1                                                                                                                                                                                                                                                                                                                                                                                                                                                                                                                                                                                                                                                                                                                                                                                                                                                                                                                                                                                                                                                                         |
|                                    | cell part                                                              | 3              | GO:0044464  | 36      | 2336       | 39          | 4311           | 1.7             | 3.95724E-07                 | 6.4                                                                                                                                             | CSA023611.1 CSA028657.1 CSA014226.1 CSA006911.1 CSA032664.1 CSA008945.1 CSA018159.1 CSA008625.1 CSA036590.1 CSA011729.1 CSA023566.1 CSA033261.1 CSA018664.1 CSA030275.1 CSA028748.1 CSA022360.1 CSA001667.1 CSA033994.1 CSA033864.1 CSA004105.1 CSA020098.1 CSA029580.1 CSA030920.1 CSA007724.1 CSA019651.1 CSA029723.1 CSA000627.1 CSA036240.1 CSA005660.1 CSA006518.1 CSA030434.1 CSA003990.1 CSA034381.1 CSA034513.1 CSA002712.1 CSA033259.1                                                                                                                                                                                                                                                                                                                                                                                                                                                                                                                                                                                                                                                                                                                                                                                                                                                                                                                                                                                                                                                                         |
|                                    | cytoplasm                                                              | 6              | GO:0005737  | 24      | 1079       | 39          | 4311           | 2.46            | 3.37566E-06                 | 5.47                                                                                                                                            | CSA014226.1 CSA006911.1 CSA008945.1 CSA001667.1 CSA033994.1 CSA018159.1 CSA008625.1 CSA020098.1 CSA036590.1 CSA029580.1 CSA019651.1 CSA011729.1 CSA023566.1 CSA029723.1 CSA036240.1 CSA005660.1 CSA006518.1 CSA030434.1 CSA003990.1 CSA033261.1 CSA034381.1 CSA018664.1 CSA002712.1 CSA030275.1                                                                                                                                                                                                                                                                                                                                                                                                                                                                                                                                                                                                                                                                                                                                                                                                                                                                                                                                                                                                                                                                                                                                                                                                                         |
|                                    | intracellular part                                                     | 5              | GO:0044424  | 32      | 2049       | 39          | 4311           | 1.73            | 1.53087E-05                 | 4.82                                                                                                                                            | CSA023611.1 CSA028657.1 CSA014226.1 CSA006911.1 CSA008945.1 CSA018159.1 CSA008625.1 CSA036590.1 CSA011729.1 CSA023566.1 CSA033261.1 CSA018664.1 CSA030275.1 CSA022360.1 CSA001667.1 CSA033994.1 CSA033864.1 CSA020098.1 CSA029580.1 CSA030920.1 CSA019651.1 CSA029723.1 CSA000627.1 CSA036240.1 CSA005660.1 CSA006518.1 CSA030434.1 CSA034381.1 CSA003990.1 CSA034513.1 CSA002712.1 CSA033259.1                                                                                                                                                                                                                                                                                                                                                                                                                                                                                                                                                                                                                                                                                                                                                                                                                                                                                                                                                                                                                                                                                                                         |
|                                    | catalytic complex                                                      | 3              | GO:1902494  | 7       | 239        | 39          | 4311           | 3.24            | 0.01688336                  | 1.77                                                                                                                                            | CSA034381.1 CSA029723.1 CSA000627.1 CSA002712.1 CSA034513.1 CSA033259.1 CSA030920.1                                                                                                                                                                                                                                                                                                                                                                                                                                                                                                                                                                                                                                                                                                                                                                                                                                                                                                                                                                                                                                                                                                                                                                                                                                                                                                                                                                                                                                     |
|                                    | oxidoreductase complex                                                 | 4              | GO:1990204  | 3       | 36         | 39          | 4311           | 9.21            | 0.039494371                 | 1.4                                                                                                                                             | CSA029723.1 CSA000627.1 CSA033259.1                                                                                                                                                                                                                                                                                                                                                                                                                                                                                                                                                                                                                                                                                                                                                                                                                                                                                                                                                                                                                                                                                                                                                                                                                                                                                                                                                                                                                                                                                     |
|                                    | phosphopyruvate hydratase complex                                      | 10             | GO:0000015  | 2       | 5          | 39          | 4311           | 44.22           | 0.043322886                 | 1.36                                                                                                                                            | CSA034381.1 CSA002712.1                                                                                                                                                                                                                                                                                                                                                                                                                                                                                                                                                                                                                                                                                                                                                                                                                                                                                                                                                                                                                                                                                                                                                                                                                                                                                                                                                                                                                                                                                                 |
| Biological Process                 | organic acid metabolic process                                         | 5              | GO:0006082  | 34      | 612        | 131         | 11709          | 4.97            | 3.02536E-13                 | 12.52                                                                                                                                           | CSA035207.1 CSA009966.1 CSA009025.1 CSA014226.1 CSA025613.1 CSA019750.1 CSA008625.1 CSA019996.1 CSA017525.1 CSA004187.1 CSA020117.1 CSA017616.1 CSA023566.1 CSA032333.1 CSA003654.1 CSA018664.1 CSA015603.1 CSA004395.1 CSA034775.1 CSA000242.1 CSA009889.1 CSA013744.1 CSA010785.1 CSA029723.1 CSA026696.1 CSA031781.1 CSA032885.1 CSA017504.1 CSA015996.1 CSA003990.1 CSA034381.1 CSA009205.1 CSA003086.1 CSA002712.1                                                                                                                                                                                                                                                                                                                                                                                                                                                                                                                                                                                                                                                                                                                                                                                                                                                                                                                                                                                                                                                                                                 |
|                                    | oxoacid metabolic process                                              | 6              | GO:0043436  | 34      | 611        | 131         | 11709          | 4.97            | 7.34635E-13                 | 12.13                                                                                                                                           | CSA035207.1 CSA009966.1 CSA009025.1 CSA014226.1 CSA025613.1 CSA019750.1 CSA008625.1 CSA019996.1 CSA017525.1 CSA004187.1 CSA020117.1 CSA017616.1 CSA023566.1 CSA032333.1 CSA003654.1 CSA018664.1 CSA015603.1 CSA004395.1 CSA034775.1 CSA000242.1 CSA009889.1 CSA013744.1 CSA010785.1 CSA029723.1 CSA026696.1 CSA031781.1 CSA032885.1 CSA017504.1 CSA015996.1 CSA003990.1 CSA034381.1 CSA009205.1 CSA003086.1 CSA002712.1                                                                                                                                                                                                                                                                                                                                                                                                                                                                                                                                                                                                                                                                                                                                                                                                                                                                                                                                                                                                                                                                                                 |
|                                    | carboxylic acid metabolic process                                      | 7              | GO:0019752  | 34      | 597        | 131         | 11709          | 5.09            | 9.70002E-13                 | 12.01                                                                                                                                           | CSA035207.1 CSA009966.1 CSA009025.1 CSA014226.1 CSA025613.1 CSA019750.1 CSA008625.1 CSA019996.1 CSA017525.1 CSA004187.1 CSA020117.1 CSA017616.1 CSA023566.1 CSA032333.1 CSA003654.1 CSA018664.1 CSA015603.1 CSA004395.1 CSA034775.1 CSA000242.1 CSA009889.1 CSA013744.1 CSA010785.1 CSA029723.1 CSA026696.1 CSA031781.1 CSA032885.1 CSA017504.1 CSA015996.1 CSA003990.1 CSA034381.1 CSA009205.1 CSA003086.1 CSA002712.1                                                                                                                                                                                                                                                                                                                                                                                                                                                                                                                                                                                                                                                                                                                                                                                                                                                                                                                                                                                                                                                                                                 |
|                                    | small molecule metabolic process                                       | 4              | GO:0044281  | 44      | 943        | 131         | 11709          | 4.17            | 1.09901E-12                 | 11.96                                                                                                                                           | CSA035207.1 CSA009966.1 CSA009025.1 CSA014226.1 CSA025613.1 CSA019750.1 CSA008625.1 CSA019996.1 CSA017525.1 CSA004187.1 CSA020117.1 CSA017616.1 CSA023566.1 CSA032333.1 CSA003654.1 CSA018664.1 CSA015603.1 CSA004395.1 CSA034775.1 CSA000242.1 CSA009889.1 CSA013744.1 CSA010785.1 CSA029723.1 CSA026696.1 CSA031781.1 CSA032885.1 CSA017504.1 CSA015996.1 CSA003990.1 CSA034381.1 CSA009205.1 CSA003086.1 CSA011054.1 CSA002712.1                                                                                                                                                                                                                                                                                                                                                                                                                                                                                                                                                                                                                                                                                                                                                                                                                                                                                                                                                                                                                                                                                     |
|                                    | single-organism metabolic process                                      | 3              | GO:0044710  | 69      | 2860       | 131         | 11709          | 2.16            | 5.82788E-12                 | 11.23                                                                                                                                           | CSA027795.1 CSA020605.1 CSA017525.1 CSA017616.1 CSA023566.1 CSA034340.1 CSA015823.1 CSA032333.1 CSA034422.1 CSA016736.1 CSA035914.1 CSA010519.1 CSA015603.1 CSA033994.1 CSA034775.1 CSA000242.1 CSA009889.1 CSA025110.1 CSA018950.1 CSA015996.1 CSA003990.1 CSA009205.1 CSA003086.1 CSA007312.1 CSA028496.1 CSA017438.1 CSA002712.1 CSA035207.1 CSA009966.1 CSA025613.1 CSA011668.1 CSA034838.1 CSA019750.1 CSA004930.1 CSA026796.1 CSA032676.1 CSA008625.1 CSA019996.1 CSA004187.1 CSA001302.1 CSA020117.1 CSA036932.1 CSA016186.1 CSA021512.1 CSA033261.1 CSA036938.1 CSA018664.1 CSA003654.1 CSA031477.1 CSA010160.1 CSA035408.1 CSA001272.1 CSA024857.1 CSA004395.1 CSA018282.1 CSA013744.1 CSA010785.1 CSA029723.1 CSA030116.1 CSA031781.1 CSA026696.1 CSA032885.1 CSA003060.1 CSA017504.1 CSA034381.1 CSA018288.1 CSA011054.1                                                                                                                                                                                                                                                                                                                                                                                                                                                                                                                                                                                                                                                                                     |
|                                    | single-organism cellular process                                       | 3              | GO:0044763  | 50      | 1885       | 131         | 11709          | 2.37            | 1.87283E-09                 | 8.73                                                                                                                                            | CSA035207.1 CSA028657.1 CSA009966.1 CSA009025.1 CSA014226.1 CSA025613.1 CSA019750.1 CSA034838.1 CSA008625.1 CSA019996.1 CSA017525.1 CSA004187.1 CSA020117.1 CSA017616.1 CSA023566.1 CSA032333.1 CSA003654.1 CSA018664.1 CSA015603.1 CSA004395.1 CSA034775.1 CSA000242.1 CSA009889.1 CSA013744.1 CSA029723.1 CSA010785.1 CSA008457.1 CSA031781.1 CSA026696.1 CSA032885.1 CSA017504.1 CSA015996.1 CSA003990.1 CSA034381.1 CSA009205.1 CSA003086.1 CSA018288.1 CSA007312.1 CSA028496.1 CSA011054.1 CSA002712.1 CSA017438.1                                                                                                                                                                                                                                                                                                                                                                                                                                                                                                                                                                                                                                                                                                                                                                                                                                                                                                                                                                                                 |
|                                    | single-organism process                                                | 2              | GO:0044699  | 77      | 3982       | 131         | 11709          | 1.73            | 8.53503E-09                 | 8.07                                                                                                                                            | CSA027795.1 CSA020605.1 CSA017525.1 CSA017616.1 CSA023566.1 CSA034340.1 CSA015823.1 CSA032333.1 CSA034422.1 CSA016736.1 CSA035914.1 CSA010519.1 CSA015603.1 CSA033994.1 CSA034775.1 CSA000242.1 CSA009889.1 CSA025110.1 CSA018950.1 CSA015996.1 CSA003990.1 CSA009205.1 CSA003086.1 CSA007312.1 CSA028496.1 CSA017438.1 CSA002712.1 CSA028657.1 CSA035207.1 CSA012305.1 CSA009025.1 CSA009966.1 CSA025613.1 CSA011668.1 CSA034838.1 CSA019750.1 CSA004930.1 CSA026796.1 CSA008625.1 CSA019996.1 CSA004187.1 CSA001302.1 CSA020117.1 CSA036932.1 CSA016186.1 CSA021512.1 CSA033261.1 CSA036938.1 CSA018664.1 CSA003654.1 CSA031477.1 CSA010160.1 CSA035408.1 CSA001272.1 CSA024857.1 CSA004395.1 CSA018282.1 CSA013744.1 CSA010785.1 CSA029723.1 CSA030116.1 CSA031781.1 CSA026696.1 CSA032885.1 CSA003060.1 CSA017504.1 CSA034381.1 CSA018288.1 CSA011054.1                                                                                                                                                                                                                                                                                                                                                                                                                                                                                                                                                                                                                                                             |
|                                    | organonitrogen compound metabolic process                              | 4              | GO:1901564  | 38      | 1280       | 131         | 11709          | 2.65            | 2.6215E-08                  | 7.58                                                                                                                                            | CSA003232.1 CSA010527.1 CSA035207.1 CSA009966.1 CSA025613.1 CSA006911.1 CSA019750.1 CSA034838.1 CSA008625.1 CSA019996.1 CSA017525.1 CSA004187.1 CSA020117.1 CSA036932.1 CSA023566.1 CSA003654.1 CSA018664.1 CSA028748.1 CSA001667.1 CSA015603.1 CSA033994.1 CSA009889.1 CSA020098.1 CSA007724.1 CSA013744.1 CSA010785.1 CSA029723.1 CSA031781.1 CSA026696.1 CSA036240.1 CSA030434.1 CSA015996.1 CSA003990.1 CSA034381.1 CSA003086.1 CSA028496.1 CSA002712.1                                                                                                                                                                                                                                                                                                                                                                                                                                                                                                                                                                                                                                                                                                                                                                                                                                                                                                                                                                                                                                                             |
|                                    | glycine metabolic process                                              | 11             | GO:0006544  | 7       | 20         | 131         | 11709          | 31.28           | 5.69141E-08                 | 7.24                                                                                                                                            | CSA020117.1 CSA013744.1 CSA015996.1 CSA029723.1 CSA025613.1 CSA009889.1 CSA019996.1                                                                                                                                                                                                                                                                                                                                                                                                                                                                                                                                                                                                                                                                                                                                                                                                                                                                                                                                                                                                                                                                                                                                                                                                                                                                                                                                                                                                                                     |
|                                    | single-organism catabolic process                                      | 4              | GO:0044712  | 13      | 155        | 131         | 11709          | 7.5             | 1.42028E-07                 | 6.85                                                                                                                                            | CSA020117.1 CSA035207.1 CSA029723.1 CSA009966.1 CSA031781.1 CSA015603.1 CSA019750.1 CSA015996.1 CSA033261.1 CSA034381.1 CSA019996.1 CSA002712.1 CSA017525.1                                                                                                                                                                                                                                                                                                                                                                                                                                                                                                                                                                                                                                                                                                                                                                                                                                                                                                                                                                                                                                                                                                                                                                                                                                                                                                                                                             |
|                                    | single-organism carbohydrate metabolic process                         | 5              | GO:0044723  | 16      | 263        | 131         | 11709          | 5.44            | 2.10983E-07                 | 6.68                                                                                                                                            | CSA035207.1 CSA009966.1 CSA024857.1 CSA011668.1 CSA015603.1 CSA019750.1 CSA026796.1 CSA017525.1 CSA018950.1 CSA034422.1 CSA034381.1 CSA033261.1 CSA007312.1 CSA035914.1 CSA002712.1 CSA017438.1                                                                                                                                                                                                                                                                                                                                                                                                                                                                                                                                                                                                                                                                                                                                                                                                                                                                                                                                                                                                                                                                                                                                                                                                                                                                                                                         |
|                                    | cellular amino acid metabolic process                                  | 8              | GO:0006520  | 17      | 317        | 131         | 11709          | 4.79            | 4.2596E-07                  | 6.37                                                                                                                                            | CSA025613.1 CSA008625.1 CSA009889.1 CSA019996.1 CSA004187.1 CSA020117.1 CSA023566.1 CSA013744.1 CSA029723.1 CSA010785.1 CSA031781.1 CSA026696.1 CSA015996.1 CSA003990.1 CSA003086.1 CSA018664.1 CSA003654.1                                                                                                                                                                                                                                                                                                                                                                                                                                                                                                                                                                                                                                                                                                                                                                                                                                                                                                                                                                                                                                                                                                                                                                                                                                                                                                             |
|                                    | generation of precursor metabolites and energy                         | 4              | GO:0006091  | 12      | 148        | 131         | 11709          | 7.25            | 7.26835E-07                 | 6.14                                                                                                                                            | CSA035207.1 CSA009966.1 CSA032885.1 CSA004395.1 CSA015603.1 CSA019750.1 CSA017504.1 CSA032333.1 CSA034381.1 CSA009205.1 CSA002712.1 CSA017525.1                                                                                                                                                                                                                                                                                                                                                                                                                                                                                                                                                                                                                                                                                                                                                                                                                                                                                                                                                                                                                                                                                                                                                                                                                                                                                                                                                                         |
| alpha-amino acid metabolic process | 9                                                                      | GO:1901605     | 12          | 155     | 131        | 11709       | 6.92           | 1.15172E-06     | 5.94                        | CSA020117.1 CSA013744.1 CSA010785.1 CSA029723.1 CSA025613.1 CSA026696.1 CSA031781.1 CSA015996.1 CSA009889.1 CSA003654.1 CSA019996.1 CSA004187.1 |                                                                                                                                                                                                                                                                                                                                                                                                                                                                                                                                                                                                                                                                                                                                                                                                                                                                                                                                                                                                                                                                                                                                                                                                                                                                                                                                                                                                                                                                                                                         |

| KEGG pathway                                         | Mapping | Background | All Mapping | All Background | Fold enrichment | Fisher's exact test p value | -log10(p value) | Related proteins                                                                                                                                                                                                                                                        |
|------------------------------------------------------|---------|------------|-------------|----------------|-----------------|-----------------------------|-----------------|-------------------------------------------------------------------------------------------------------------------------------------------------------------------------------------------------------------------------------------------------------------------------|
| ath00630 Glyoxylate and dicarboxylate metabolism     | 22      | 58         | 116         | 3267           | 10.68           | 5.39568E-14                 | 13.27           | CSA035408.1 CSA001272.1 CSA022831.1 CSA025613.1 CSA034775.1 CSA000242.1 CSA024921.1 CSA020587.1 CSA009889.1 CSA019996.1 CSA020117.1 CSA016186.1 CSA029723.1 CSA025704.1 CSA010785.1 CSA000918.1 CSA017504.1 CSA004763.1 CSA015996.1 CSA036938.1 CSA003654.1 CSA010160.1 |
| ath00710 Carbon fixation in photosynthetic organisms | 13      | 57         | 116         | 3267           | 9.39            | 2.08389E-13                 | 12.68           | CSA035207.1 CSA009966.1 CSA015603.1 CSA019750.1 CSA026796.1 CSA020587.1 CSA000795.1 CSA017654.1 CSA018950.1 CSA034492.1 CSA012532.1 CSA004763.1 CSA036938.1                                                                                                             |
| ath00020 Citrate cycle (TCA cycle)                   | 9       | 40         | 116         | 3267           | 6.34            | 5.53517E-05                 | 4.26            | CSA025704.1 CSA004395.1 CSA017504.1 CSA034775.1 CSA034373.1 CSA000242.1 CSA032333.1 CSA009205.1 CSA010160.1                                                                                                                                                             |
| ath00260 Glycine, serine and threonine metabolism    | 10      | 57         | 116         | 3267           | 4.94            | 0.000131718                 | 3.88            | CSA020117.1 CSA029723.1 CSA000918.1 CSA025613.1 CSA030116.1 CSA015996.1 CSA024921.1 CSA009889.1 CSA019996.1 CSA010160.1                                                                                                                                                 |
| ath00196 Photosynthesis - antenna proteins           | 6       | 16         | 116         | 3267           | 10.56           | 0.000158607                 | 3.8             | CSA019572.1 CSA004532.1 CSA016587.1 CSA010862.1 CSA011328.1 CSA024064.1                                                                                                                                                                                                 |
| ath00010 Glycolysis / Gluconeogenesis                | 11      | 85         | 116         | 3267           | 3.64            | 0.000665951                 | 3.18            | CSA034340.1 CSA035207.1 CSA009966.1 CSA030116.1 CSA015603.1 CSA019750.1 CSA034381.1 CSA017654.1 CSA002712.1 CSA017525.1 CSA010160.1 CSA018950.1 CSA026796.1                                                                                                             |
| ath00030 Pentose phosphate pathway                   | 7       | 45         | 116         | 3267           | 4.38            | 0.004426525                 | 2.35            | CSA034838.1 CSA034340.1 CSA035207.1 CSA009966.1 CSA017654.1 CSA017525.1 CSA012532.1                                                                                                                                                                                     |
| ath00053 Ascorbate and aldarate metabolism           | 6       | 37         | 116         | 3267           | 4.57            | 0.008769056                 | 2.06            | CSA032553.1 CSA034927.1 CSA018282.1 CSA030116.1 CSA035044.1 CSA027795.1                                                                                                                                                                                                 |
| ath00620 Pyruvate metabolism                         | 7       | 67         | 116         | 3267           | 2.94            | 0.029036969                 | 1.54            | CSA034775.1 CSA000242.1 CSA017616.1 CSA011363.1 CSA009025.1 CSA030116.1 CSA010160.1                                                                                                                                                                                     |
| ath00910 Nitrogen metabolism                         | 4       | 21         | 116         | 3267           | 5.36            | 0.035599895                 | 1.45            | CSA022831.1 CSA010785.1 CSA002108.1 CSA003654.1                                                                                                                                                                                                                         |

| Domain Description                                                           | Mapping | Background | All Mapping | All Background | Fold enrichment | Fisher's exact test p value | -log10(P value) | Related Protein                                                                                                                                                                                                                                                                     |
|------------------------------------------------------------------------------|---------|------------|-------------|----------------|-----------------|-----------------------------|-----------------|-------------------------------------------------------------------------------------------------------------------------------------------------------------------------------------------------------------------------------------------------------------------------------------|
| NAD(P)-binding domain                                                        | 23      | 578        | 175         | 22761          | 5.18            | 6.4575E-10                  | 9.19            | CSA009025.1 CSA024857.1 CSA011668.1 CSA034838.1 CSA034775.1 CSA000242.1 CSA026796.1 CSA021957.1 CSA018950.1 CSA016186.1 CSA017616.1 CSA031781.1 CSA013010.1 CSA034373.1 CSA014904.1 CSA036476.1 CSA034927.1 CSA035914.1 CSA010323.1 CSA003086.1 CSA017430.1 CSA031477.1 CSA031127.1 |
| Pyridoxal phosphate-dependent transferase, major region, subdomain 1         | 10      | 122        | 175         | 22761          | 10.66           | 4.21661E-07                 | 6.38            | CSA020117.1 CSA013744.1 CSA000918.1 CSA025613.1 CSA015996.1 CSA024921.1 CSA028285.1 CSA009889.1 CSA018092.1 CSA004187.1                                                                                                                                                             |
| Pyridoxal phosphate-dependent transferase                                    | 10      | 134        | 175         | 22761          | 9.71            | 9.32568E-07                 | 6.03            | CSA020117.1 CSA013744.1 CSA000918.1 CSA025613.1 CSA015996.1 CSA024921.1 CSA028285.1 CSA009889.1 CSA018092.1 CSA004187.1                                                                                                                                                             |
| Chlorophyll a/b binding protein domain                                       | 6       | 31         | 175         | 22761          | 25.17           | 3.56492E-06                 | 5.45            | CSA019572.1 CSA004532.1 CSA016587.1 CSA010862.1 CSA011328.1 CSA024064.1                                                                                                                                                                                                             |
| Pyridoxal phosphate-dependent transferase, major region, subdomain 2         | 8       | 91         | 175         | 22761          | 11.43           | 6.37697E-06                 | 5.2             | CSA013744.1 CSA000918.1 CSA025613.1 CSA024921.1 CSA028285.1 CSA009889.1 CSA018092.1 CSA004187.1                                                                                                                                                                                     |
| Aldolase-type TIM barrel                                                     | 7       | 125        | 175         | 22761          | 7.28            | 0.000405234                 | 3.39            | CSA019750.1 CSA035207.1 CSA024855.1 CSA009966.1 CSA004197.1 CSA003654.1 CSA015603.1                                                                                                                                                                                                 |
| Ribulose biphosphate carboxylase, large subunit, C-terminal                  | 3       | 6          | 175         | 22761          | 65.03           | 0.000854194                 | 3.07            | CSA036938.1 CSA036936.1 CSA020605.1                                                                                                                                                                                                                                                 |
| GroEL-like apical domain                                                     | 4       | 29         | 175         | 22761          | 17.94           | 0.001386246                 | 2.86            | CSA006518.1 CSA035465.1 CSA008945.1 CSA036590.1                                                                                                                                                                                                                                     |
| GroEL-like equatorial domain                                                 | 4       | 40         | 175         | 22761          | 13.01           | 0.003524728                 | 2.45            | CSA006518.1 CSA035465.1 CSA008945.1 CSA036590.1                                                                                                                                                                                                                                     |
| Glyceraldehyde 3-phosphate dehydrogenase, catalytic domain                   | 3       | 12         | 175         | 22761          | 32.52           | 0.003646691                 | 2.44            | CSA026796.1 CSA018950.1 CSA011668.1                                                                                                                                                                                                                                                 |
| Glyceraldehyde 3-phosphate dehydrogenase, NAD(P) binding domain              | 3       | 13         | 175         | 22761          | 30.01           | 0.004288142                 | 2.37            | CSA026796.1 CSA018950.1 CSA011668.1                                                                                                                                                                                                                                                 |
| Thioredoxin-like fold                                                        | 8       | 274        | 175         | 22761          | 3.8             | 0.005243716                 | 2.28            | CSA003232.1 CSA008457.1 CSA010519.1 CSA035117.1 CSA035044.1 CSA030616.1 CSA018288.1 CSA011054.1                                                                                                                                                                                     |
| Lactate/malate dehydrogenase, N-terminal                                     | 3       | 16         | 175         | 22761          | 24.39           | 0.006498644                 | 2.19            | CSA034775.1 CSA017616.1 CSA000242.1                                                                                                                                                                                                                                                 |
| Lactate/malate dehydrogenase, C-terminal                                     | 3       | 20         | 175         | 22761          | 19.51           | 0.010085632                 | 2               | CSA034775.1 CSA017616.1 CSA000242.1                                                                                                                                                                                                                                                 |
| Lactate dehydrogenase/glycoside hydrolase, family 4, C-terminal              | 3       | 21         | 175         | 22761          | 18.58           | 0.011091727                 | 1.96            | CSA034775.1 CSA017616.1 CSA000242.1                                                                                                                                                                                                                                                 |
| Translation elongation factor EFTu-like, domain 2                            | 3       | 24         | 175         | 22761          | 16.26           | 0.014361115                 | 1.84            | CSA028748.1 CSA001667.1 CSA011928.1                                                                                                                                                                                                                                                 |
| Ribulose-1,5-bisphosphate carboxylase small subunit, N-terminal              | 2       | 2          | 175         | 22761          | 130.06          | 0.015231203                 | 1.82            | CSA004763.1 CSA020587.1                                                                                                                                                                                                                                                             |
| Ribosomal protein S5 domain 2-type fold                                      | 4       | 75         | 175         | 22761          | 6.94            | 0.019842429                 | 1.7             | CSA013547.1 CSA036240.1 CSA013811.1 CSA011928.1                                                                                                                                                                                                                                     |
| Ribulose bisphosphate carboxylase small chain, domain                        | 2       | 3          | 175         | 22761          | 86.71           | 0.022760083                 | 1.64            | CSA004763.1 CSA020587.1                                                                                                                                                                                                                                                             |
| Transcription factor, GTP-binding domain                                     | 3       | 31         | 175         | 22761          | 12.59           | 0.023367427                 | 1.63            | CSA028748.1 CSA001667.1 CSA011928.1                                                                                                                                                                                                                                                 |
| Thioredoxin domain                                                           | 4       | 83         | 175         | 22761          | 6.27            | 0.025838111                 | 1.59            | CSA008457.1 CSA018288.1 CSA010519.1 CSA011054.1                                                                                                                                                                                                                                     |
| Catalase immune-responsive domain                                            | 2       | 4          | 175         | 22761          | 65.03           | 0.03023173                  | 1.52            | CSA035408.1 CSA001272.1                                                                                                                                                                                                                                                             |
| Ribulose bisphosphate carboxylase, large subunit, ferredoxin-like N-terminal | 2       | 4          | 175         | 22761          | 65.03           | 0.03023173                  | 1.52            | CSA036938.1 CSA020605.1                                                                                                                                                                                                                                                             |
| Enolase, N-terminal                                                          | 2       | 5          | 175         | 22761          | 52.03           | 0.037646577                 | 1.42            | CSA034381.1 CSA002712.1                                                                                                                                                                                                                                                             |
| Enolase, C-terminal TIM barrel domain                                        | 2       | 5          | 175         | 22761          | 52.03           | 0.037646577                 | 1.42            | CSA034381.1 CSA002712.1                                                                                                                                                                                                                                                             |



Table S5. The information of S-nitrosylated proteins in multiple metabolic pathways .

| Glycolysis        |          |            |                                                                                                        |                          |             |                                                                                        |
|-------------------|----------|------------|--------------------------------------------------------------------------------------------------------|--------------------------|-------------|----------------------------------------------------------------------------------------|
| Protein accession | Position | Amino acid | Protein description                                                                                    | Subcellular localization | KEGG KO No. | KEGG Gene                                                                              |
| CSA017525.1       | 8        | C          | "Glucose-6-phosphate isomerase, cytosolic 1 OS=Clarkia xantiana GN=PGIC1 PE=3 SV=1"                    | cytoplasm                | K01810      | GPI; glucose-6-phosphate isomerase [EC:5.3.1.9]                                        |
| CSA017654.1       | 365      | C          | "Fructose-1,6-bisphosphatase, chloroplastic OS=Pisum sativum GN=FBP PE=1 SV=2"                         | chloroplast              | K03841      | FBP; fructose-1,6-bisphosphatase I [EC:3.1.3.11]                                       |
| CSA009966.1       | 276      | C          | "Fructose-bisphosphate aldolase 2, chloroplastic OS=Arabidopsis thaliana GN=FBA2 PE=1 SV=2"            | chloroplast              | K01623      | ALDO; fructose-bisphosphate aldolase, class I [EC:4.1.2.13]                            |
| CSA009966.1       | 162      | C          | "Fructose-bisphosphate aldolase 2, chloroplastic OS=Arabidopsis thaliana GN=FBA2 PE=1 SV=2"            | chloroplast              | K01623      | ALDO; fructose-bisphosphate aldolase, class I [EC:4.1.2.13]                            |
| CSA009966.1       | 78       | C          | "Fructose-bisphosphate aldolase 2, chloroplastic OS=Arabidopsis thaliana GN=FBA2 PE=1 SV=2"            | chloroplast              | K01623      | ALDO; fructose-bisphosphate aldolase, class I [EC:4.1.2.13]                            |
| CSA035207.1       | 246      | C          | "Fructose-bisphosphate aldolase, cytoplasmic isozyme OS=Cicer arietinum GN=ALDC PE=2 SV=1"             | cytoplasm                | K01623      | ALDO; fructose-bisphosphate aldolase, class I [EC:4.1.2.13]                            |
| CSA015603.1       | 202      | C          | "Triosephosphate isomerase, chloroplastic OS=Frangaria ananassa GN=TPI PE=2 SV=1"                      | chloroplast              | K01803      | TPI; triosephosphate isomerase (TIM) [EC:5.3.1.1]                                      |
| CSA019750.1       | 67       | C          | "Triosephosphate isomerase, cytosolic OS=Petunia hybrida GN=TPIP1 PE=2 SV=1"                           | chloroplast              | K01803      | TPI; triosephosphate isomerase (TIM) [EC:5.3.1.1]                                      |
| CSA019750.1       | 165      | C          | "Triosephosphate isomerase, cytosolic OS=Petunia hybrida GN=TPIP1 PE=2 SV=1"                           | chloroplast              | K01803      | TPI; triosephosphate isomerase (TIM) [EC:5.3.1.1]                                      |
| CSA019750.1       | 153      | C          | "Triosephosphate isomerase, cytosolic OS=Petunia hybrida GN=TPIP1 PE=2 SV=1"                           | chloroplast              | K01803      | TPI; triosephosphate isomerase (TIM) [EC:5.3.1.1]                                      |
| CSA034340.1       | 50       | C          | NADP-dependent glyceraldehyde-3-phosphate dehydrogenase OS=Nicotiana plumbaginifolia GN=GAPN PE=2 SV=1 | cytoskeleton             | K00131      | gapN; glyceraldehyde-3-phosphate dehydrogenase (NADP+) [EC:1.2.1.9]                    |
| CSA002712.1       | 282      | C          | Enolase 1 OS=Hevea brasiliensis GN=ENO1 PE=1 SV=1                                                      | chloroplast              | K01689      | ENO; enolase [EC:4.2.1.11]                                                             |
| CSA002712.1       | 107      | C          | Enolase 1 OS=Hevea brasiliensis GN=ENO1 PE=1 SV=1                                                      | chloroplast              | K01689      | ENO; enolase [EC:4.2.1.11]                                                             |
| CSA034381.1       | 107      | C          | Enolase 2 OS=Zea mays GN=ENO2 PE=2 SV=1                                                                | cytoplasm                | K01689      | ENO; enolase [EC:4.2.1.11]                                                             |
| CSA018950.1       | 367      | C          | "Glyceraldehyde-3-phosphate dehydrogenase B, chloroplastic OS=Pisum sativum GN=GAPB PE=2 SV=2"         | chloroplast              | K05298      | GAPB; glyceraldehyde-3-phosphate dehydrogenase (NADP+) (phosphorylating) [EC:1.2.1.13] |
| CSA018950.1       | 441      | C          | "Glyceraldehyde-3-phosphate dehydrogenase B, chloroplastic OS=Pisum sativum GN=GAPB PE=2 SV=2"         | chloroplast              | K05298      | GAPB; glyceraldehyde-3-phosphate dehydrogenase (NADP+) (phosphorylating) [EC:1.2.1.13] |
| CSA026796.1       | 346      | C          | "Glyceraldehyde-3-phosphate dehydrogenase A, chloroplastic OS=Spinacia oleracea GN=GAPA PE=1 SV=2"     | chloroplast              | K05298      | GAPA; glyceraldehyde-3-phosphate dehydrogenase (NADP+) (phosphorylating) [EC:1.2.1.13] |

## Pyruvate metabolism

| Protein accession | Position | Amino acid | Protein description                                                                      | Subcellular localization | KEGG KO No. | KEGG Gene                                                                           |
|-------------------|----------|------------|------------------------------------------------------------------------------------------|--------------------------|-------------|-------------------------------------------------------------------------------------|
| CSA000242.1       | 125      | C          | "Malate dehydrogenase 2, cytoplasmic OS=Arabidopsis thaliana GN=MDH2 PE=1 SV=1"          | cytoplasm                | K00025      | MDH2; malate dehydrogenase [EC:1.1.1.37]                                            |
| CSA034775.1       | 516      | C          | "Malate dehydrogenase 1, mitochondrial OS=Arabidopsis thaliana GN=At1g53240 PE=1 SV=1"   | chloroplast              | K00026      | MDH1; malate dehydrogenase [EC:1.1.1.37]                                            |
| CSA017616.1       | 334      | C          | "Malate dehydrogenase [NADP], chloroplastic OS=Pisum sativum PE=1 SV=2"                  | cytoplasm                | K00051      | E1.1.1.82; malate dehydrogenase (NADP+) [EC:1.1.1.82]                               |
| CSA017616.1       | 346      | C          | "Malate dehydrogenase [NADP], chloroplastic OS=Pisum sativum PE=1 SV=2"                  | cytoplasm                | K00051      | E1.1.1.82; malate dehydrogenase (NADP+) [EC:1.1.1.82]                               |
| CSA009025.1       | 548      | C          | NADP-dependent malic enzyme OS=Vitis vinifera PE=2 SV=1                                  | chloroplast              | K00029      | E1.1.1.40; malate dehydrogenase (oxaloacetate-decarboxylating)(NADP+) [EC:1.1.1.40] |
| CSA010160.1       | 485      | C          | "Dihydrolipoyl dehydrogenase 1, mitochondrial OS=Arabidopsis thaliana GN=LPD1 PE=1 SV=2" | chloroplast              | K00382      | DLD; dihydrolipoamide dehydrogenase [EC:1.8.1.4]                                    |
| CSA030116.1       | 65       | C          | Aldehyde dehydrogenase family 7 member B4 OS=Arabidopsis thaliana GN=ALDH7B4 PE=2 SV=3   | cytoplasm                | K14085      | ALDH7A1; aldehyde dehydrogenase family 7 member A1 [EC:1.2.1.31 1.2.1.8 1.2.1.3]    |
| CSA011363.1       | 44       | C          | Lactoylglutathione lyase OS=Oryza sativa subsp. japonica GN=GLYI-11 PE=1 SV=2            | cytoplasm                | K01759      | GLO1; lactoylglutathione lyase [EC:4.4.1.5]                                         |

## TCA cycle

| Protein accession | Position | Amino acid | Protein description                                                                                                            | Subcellular localization | KEGG KO No. | KEGG Gene                                                                    |
|-------------------|----------|------------|--------------------------------------------------------------------------------------------------------------------------------|--------------------------|-------------|------------------------------------------------------------------------------|
| CSA017504.1       | 438      | C          | "Citrate synthase, mitochondrial OS=Daucus carota GN=CS PE=2 SV=1"                                                             | cytoplasm                | K01647      | CS; citrate synthase [EC:2.3.3.1]                                            |
| CSA034373.1       | 33       | C          | ATP-citrate synthase beta chain protein 1 OS=Oryza sativa subsp. japonica GN=ACLB-1 PE=2 SV=1                                  | chloroplast              | K01648      | ACLY; ATP citrate (pro-S)-lyase [EC:2.3.3.8]                                 |
| CSA025704.1       | 205      | C          | "Aconitate hydratase 2, mitochondrial OS=Arabidopsis thaliana GN=ACO2 PE=1 SV=2"                                               | chloroplast              | K01681      | ACO; aconitate hydratase [EC:4.2.1.3]                                        |
| CSA032333.1       | 200      | C          | "Pyruvate dehydrogenase E1 component subunit alpha-3, chloroplastic OS=Oryza sativa subsp. japonica GN=Os04g0119400 PE=2 SV=2" | oplast,mitocho           | K00164      | OGDH; 2-oxoglutarate dehydrogenase E1 component [EC:1.2.4.2]                 |
| CSA010160.1       | 485      | C          | "Dihydrolipoyl dehydrogenase 1, mitochondrial OS=Arabidopsis thaliana GN=LPD1 PE=1 SV=2"                                       | chloroplast              | K00382      | DLD; dihydrolipoamide dehydrogenase [EC:1.8.1.4]                             |
| CSA004395.1       | 74       | C          | "Succinate dehydrogenase [ubiquinone] iron-sulfur subunit 2, mitochondrial OS=Arabidopsis thaliana GN=SDH2-2 PE=1 SV=2"        | mitochondria             | K00235      | SDHB; succinate dehydrogenase (ubiquinone) iron-sulfur subunit [EC:1.3.5.1]  |
| CSA009205.1       | 309      | C          | "Succinate dehydrogenase [ubiquinone] flavoprotein subunit 1, mitochondrial OS=Arabidopsis thaliana GN=SDH1-1 PE=1 SV=1"       | mitochondria             | K00234      | SDHA; succinate dehydrogenase (ubiquinone) flavoprotein subunit [EC:1.3.5.1] |
| CSA009205.1       | 179      | C          | "Succinate dehydrogenase [ubiquinone] flavoprotein subunit 1, mitochondrial OS=Arabidopsis thaliana GN=SDH1-1 PE=1 SV=1"       | mitochondria             | K00234      | SDHA; succinate dehydrogenase (ubiquinone) flavoprotein subunit [EC:1.3.5.1] |
| CSA000242.1       | 125      | C          | "Malate dehydrogenase 2, cytoplasmic OS=Arabidopsis thaliana GN=MDH2 PE=1 SV=1"                                                | cytoplasm                | K00025      | MDH2; malate dehydrogenase [EC:1.1.1.37]                                     |
| CSA034775.1       | 516      | C          | "Malate dehydrogenase 1, mitochondrial OS=Arabidopsis thaliana GN=At1g53240 PE=1 SV=1"                                         | chloroplast              | K00026      | MDH1; malate dehydrogenase [EC:1.1.1.37]                                     |

## Calvin cycle

| Protein accession | Position | Amino acid | Protein description                                                                                 | Subcellular localization | KEGG KO No. | KEGG Gene                                                                              |
|-------------------|----------|------------|-----------------------------------------------------------------------------------------------------|--------------------------|-------------|----------------------------------------------------------------------------------------|
| CSA012532.1       | 446      | C          | "Transketolase, chloroplastic OS=Solanum tuberosum PE=2 SV=1"                                       | chloroplast              | K00615      | TK; transketolase [EC:2.2.1.1]                                                         |
| CSA012532.1       | 151      | C          | "Transketolase, chloroplastic OS=Solanum tuberosum PE=2 SV=1"                                       | chloroplast              | K00615      | TK; transketolase [EC:2.2.1.1]                                                         |
| CSA009966.1       | 276      | C          | "Fructose-bisphosphate aldolase 2, chloroplastic OS=Arabidopsis thaliana GN=FBA2 PE=1 SV=2"         | chloroplast              | K01623      | ALDO; fructose-bisphosphate aldolase, class I [EC:4.1.2.13]                            |
| CSA009966.1       | 162      | C          | "Fructose-bisphosphate aldolase 2, chloroplastic OS=Arabidopsis thaliana GN=FBA2 PE=1 SV=2"         | chloroplast              | K01623      | ALDO; fructose-bisphosphate aldolase, class I [EC:4.1.2.13]                            |
| CSA009966.1       | 78       | C          | "Fructose-bisphosphate aldolase 2, chloroplastic OS=Arabidopsis thaliana GN=FBA2 PE=1 SV=2"         | chloroplast              | K01623      | ALDO; fructose-bisphosphate aldolase, class I [EC:4.1.2.13]                            |
| CSA035207.1       | 246      | C          | "Fructose-bisphosphate aldolase, cytoplasmic isozyme OS=Cicer arietinum GN=ALDC PE=2 SV=1"          | cytoplasm                | K01623      | ALDO; fructose-bisphosphate aldolase, class I [EC:4.1.2.13]                            |
| CSA034492.1       | 97       | C          | "Sedoheptulose-1,7-bisphosphatase, chloroplastic OS=Spinacia oleracea PE=2 SV=1"                    | chloroplast              | K01100      | SBPase; sedoheptulose-bisphosphatase [EC:3.1.3.37]                                     |
| CSA000795.1       | 67       | C          | "Phosphoribulokinase, chloroplastic OS=Triticum aestivum PE=2 SV=1"                                 | chloroplast              | K00855      | PRK; phosphoribulokinase [EC:2.7.1.19]                                                 |
| CSA000795.1       | 106      | C          | "Phosphoribulokinase, chloroplastic OS=Triticum aestivum PE=2 SV=1"                                 | chloroplast              | K00855      | PRK; phosphoribulokinase [EC:2.7.1.19]                                                 |
| CSA000795.1       | 295      | C          | "Phosphoribulokinase, chloroplastic OS=Triticum aestivum PE=2 SV=1"                                 | chloroplast              | K00855      | PRK; phosphoribulokinase [EC:2.7.1.19]                                                 |
| CSA004763.1       | 130      | C          | "Ribulose bisphosphate carboxylase small chain, chloroplastic OS=Betula pendula GN=RBCS1 PE=2 SV=1" | chloroplast              | K01602      | rbcS; ribulose-bisphosphate carboxylase small chain [EC:4.1.1.39]                      |
| CSA004763.1       | 143      | C          | "Ribulose bisphosphate carboxylase small chain, chloroplastic OS=Betula pendula GN=RBCS1 PE=2 SV=1" | chloroplast              | K01602      | rbcS; ribulose-bisphosphate carboxylase small chain [EC:4.1.1.39]                      |
| CSA020587.1       | 97       | C          | "Ribulose bisphosphate carboxylase small chain, chloroplastic OS=Brassica napus GN=RBCS PE=2 SV=2"  | chloroplast              | K01602      | rbcS; ribulose-bisphosphate carboxylase small chain [EC:4.1.1.39]                      |
| CSA036938.1       | 207      | C          | Ribulose bisphosphate carboxylase large chain OS=Carpinus caroliniana GN=rbcL PE=3 SV=1             | cytoplasm                | K01601      | rbcL; ribulose-bisphosphate carboxylase large chain [EC:4.1.1.39]                      |
| CSA036938.1       | 262      | C          | Ribulose bisphosphate carboxylase large chain OS=Carpinus caroliniana GN=rbcL PE=3 SV=1             | cytoplasm                | K01601      | rbcL; ribulose-bisphosphate carboxylase large chain [EC:4.1.1.39]                      |
| CSA036938.1       | 299      | C          | Ribulose bisphosphate carboxylase large chain OS=Carpinus caroliniana GN=rbcL PE=3 SV=1             | cytoplasm                | K01601      | rbcL; ribulose-bisphosphate carboxylase large chain [EC:4.1.1.39]                      |
| CSA018950.1       | 367      | C          | "Glyceraldehyde-3-phosphate dehydrogenase B, chloroplastic OS=Pisum sativum GN=GAPB PE=2 SV=2"      | chloroplast              | K05298      | GAPB; glyceraldehyde-3-phosphate dehydrogenase (NADP+) (phosphorylating) [EC:1.2.1.13] |
| CSA018950.1       | 441      | C          | "Glyceraldehyde-3-phosphate dehydrogenase B, chloroplastic OS=Pisum sativum GN=GAPB PE=2 SV=2"      | chloroplast              | K05298      | GAPB; glyceraldehyde-3-phosphate dehydrogenase (NADP+) (phosphorylating) [EC:1.2.1.13] |
| CSA026796.1       | 346      | C          | "Glyceraldehyde-3-phosphate dehydrogenase A, chloroplastic OS=Spinacia oleracea GN=GAPA PE=1 SV=2"  | chloroplast              | K05298      | GAPA; glyceraldehyde-3-phosphate dehydrogenase (NADP+) (phosphorylating) [EC:1.2.1.13] |
| CSA017654.1       | 365      | C          | "Fructose-1,6-bisphosphatase, chloroplastic OS=Pisum sativum GN=FBP PE=1 SV=2"                      | chloroplast              | K03841      | FBP; fructose-1,6-bisphosphatase I [EC:3.1.3.11]                                       |
| CSA015603.1       | 202      | C          | "Triosephosphate isomerase, chloroplastic OS=Fragaria ananassa GN=TPI PE=2 SV=1"                    | chloroplast              | K01803      | TPI; triosephosphate isomerase (TIM) [EC:5.3.1.1]                                      |
| CSA019750.1       | 67       | C          | "Triosephosphate isomerase, cytosolic OS=Petunia hybrida GN=TPIP1 PE=2 SV=1"                        | chloroplast              | K01803      | TPI; triosephosphate isomerase (TIM) [EC:5.3.1.1]                                      |
| CSA019750.1       | 165      | C          | "Triosephosphate isomerase, cytosolic OS=Petunia hybrida GN=TPIP1 PE=2 SV=1"                        | chloroplast              | K01803      | TPI; triosephosphate isomerase (TIM) [EC:5.3.1.1]                                      |
| CSA019750.1       | 153      | C          | "Triosephosphate isomerase, cytosolic OS=Petunia hybrida GN=TPIP1 PE=2 SV=1"                        | chloroplast              | K01803      | TPI; triosephosphate isomerase (TIM) [EC:5.3.1.1]                                      |

Table S6. The information of PPI analysis.

| Node name  | String name | Protein accession | No. of modification site | Degree | MCODE Score | KEGG Gene                                                                                    |
|------------|-------------|-------------------|--------------------------|--------|-------------|----------------------------------------------------------------------------------------------|
| GLDP1      | AT4G33010.1 | CSA015996.1       | 1                        | 13     | 8           | GLDC; glycine dehydrogenase [EC:1.4.4.2]                                                     |
| GLDP2      | AT2G26080.1 | CSA020117.1       | 1                        | 9      | 8           | GLDC; glycine dehydrogenase [EC:1.4.4.2]                                                     |
| GAPA       | AT3G26650.1 | CSA026796.1       | 1                        | 22     | 8.6727273   | GAPA; glyceraldehyde-3-phosphate dehydrogenase (NADP+) (phosphorylating) [EC:1.2.1.13]       |
| TIM        | AT2G21170.1 | CSA015603.1       | 1                        | 10     | 7.4181818   | TPI; triosephosphate isomerase (TIM) [EC:5.3.1.1]                                            |
| GAPB       | AT1G42970.1 | CSA018950.1       | 2                        | 31     | 7.125       | GAPA; glyceraldehyde-3-phosphate dehydrogenase (NADP+) (phosphorylating) [EC:1.2.1.13]       |
| TPI        | AT3G55440.1 | CSA019750.1       | 3                        | 10     | 7.4181818   | TPI; triosephosphate isomerase (TIM) [EC:5.3.1.1]                                            |
| GAPC1      | AT3G04120.1 | CSA011668.1       | 1                        | 9      | 8           |                                                                                              |
| LOS2       | AT2G36530.1 | CSA034381.1       | 1                        | 14     | 7.4181818   | ENO; enolase [EC:4.2.1.11]                                                                   |
| AT5G42740  | AT5G42740.1 | CSA017525.1       | 1                        | 11     | 7.4181818   | GPI; glucose-6-phosphate isomerase [EC:5.3.1.9]                                              |
| mtLPD1     | AT1G48030.1 | CSA010160.1       | 1                        | 12     | 8           | DLD; dihydrolipoamide dehydrogenase [EC:1.8.1.4]                                             |
| RCA        | AT2G39730.1 | CSA003662.1       | 1                        | 18     | 7.7142857   |                                                                                              |
| HCFE1      | AT3G54050.1 | CSA017654.1       | 1                        | 22     | 8.1818182   | FBP; fructose-1,6-bisphosphatase I [EC:3.1.3.11]                                             |
| SHM4       | AT4G13930.1 | CSA009889.1       | 1                        | 10     | 8           | glyA; glycine hydroxymethyltransferase [EC:2.1.2.1]                                          |
| GLU1       | AT5G04140.2 | CSA003654.1       | 1                        | 17     | 7           | E1.4.7.1; glutamate synthase (ferredoxin) [EC:1.4.7.1]                                       |
| iPGAM1     | AT1G09780.1 | CSA033261.1       | 1                        | 11     | 7.4181818   |                                                                                              |
| SHM3       | AT4G32520.1 | CSA013744.1       | 1                        | 9      | 8           |                                                                                              |
| LHCA1      | AT3G54890.1 | CSA024064.1       | 1                        | 13     | 8.6727273   | LHCA1; light-harvesting complex I chlorophyll a/b binding protein 1                          |
| LHCA3      | AT1G61520.1 | CSA016587.1       | 1                        | 12     | 7.1515152   | LHCA3; light-harvesting complex I chlorophyll a/b binding protein 3                          |
| AT2G45290  | AT2G45290.1 | CSA012532.1       | 2                        | 13     | 7.4181818   | E2.2.1.1; transketolase [EC:2.2.1.1]                                                         |
| LHCA2      | AT3G61470.1 | CSA011328.1       | 2                        | 14     | 7.8131868   | LHCA2; light-harvesting complex I chlorophyll a/b binding protein 2                          |
| AOAT2      | AT1G70580.1 | CSA024921.1       | 1                        | 15     | 8           | GGAT; glutamate--glyoxylate aminotransferase [EC:2.6.1.4 2.6.1.2 2.6.1.44]                   |
| PSAN       | AT5G64040.2 | CSA033864.1       | 2                        | 16     | 7.9615385   | psaN; photosystem I subunit PsaN                                                             |
| PRK        | AT1G32060.1 | CSA000795.1       | 3                        | 23     | 8.1818182   | PRK; phosphoribulokinase [EC:2.7.1.19]                                                       |
| LHCB4.2    | AT3G08940.2 | CSA010862.1       | 1                        | 10     | 8           | LHCB4; light-harvesting complex II chlorophyll a/b binding protein 4                         |
| PSBO1      | AT5G66570.1 | CSA000627.1       | 2                        | 17     | 7.275       | psbO; photosystem II oxygen-evolving enhancer protein 1                                      |
| LHCB5      | AT4G10340.1 | CSA004532.1       | 1                        | 13     | 8.6727273   | LHCB5; light-harvesting complex II chlorophyll a/b binding protein 5                         |
| PRXQ       | AT3G26060.2 | CSA010519.1       | 2                        | 12     | 7.8222222   |                                                                                              |
| ALDH1A3    | AT2G24270.4 | CSA034340.1       | 1                        | 9      | 8           | gapN; glyceraldehyde-3-phosphate dehydrogenase (NADP+) [EC:1.2.1.9]                          |
| PETE1      | AT1G76100.1 | CSA022661.1       | 1                        | 12     | 8           | petE; plastocyanin                                                                           |
| CSP41A     | AT3G63140.1 | CSA017430.1       | 1                        | 14     | 7.8222222   |                                                                                              |
| FNR2       | AT1G20020.1 | CSA025110.1       | 1                        | 10     | 8           | petH; ferredoxin--NADP+ reductase [EC:1.18.1.2]                                              |
| SDH1-1     | AT5G66760.1 | CSA009205.1       | 2                        | 6      | 4           | SDHA; succinate dehydrogenase (ubiquinone) flavoprotein subunit [EC:1.3.5.1]                 |
| SDH2-2     | AT5G40650.1 | CSA004395.1       | 1                        | 6      | 4           | SDHB; succinate dehydrogenase (ubiquinone) iron-sulfur subunit [EC:1.3.5.1]                  |
| AT5G65750  | AT5G65750.1 | CSA032333.1       | 1                        | 7      | 4           | OGDH; 2-oxoglutarate dehydrogenase E1 component [EC:1.2.4.2]                                 |
| ACLB-2     | AT5G49460.1 | CSA034373.1       | 1                        | 14     | 5           | ACLY; ATP citrate (pro-S)-lyase [EC:2.3.3.8]                                                 |
| mMDH1      | AT1G53240.1 | CSA034775.1       | 1                        | 9      | 4.1666667   | MDH2; malate dehydrogenase [EC:1.1.1.37]                                                     |
| c-NAD-MDH2 | AT5G43330.1 | CSA000242.1       | 1                        | 8      | 4.1666667   | MDH1; malate dehydrogenase [EC:1.1.1.37]                                                     |
| ATCS       | AT2G44350.2 | CSA017504.1       | 1                        | 13     | 5           | CS; citrate synthase [EC:2.3.3.1]                                                            |
| NADP-ME4   | AT1G79750.1 | CSA009025.1       | 1                        | 9      | 4.2857143   | E1.1.1.40; malate dehydrogenase (oxaloacetate-decarboxylating)(NADP+) [EC:1.1.1.40]          |
| AT5G58330  | AT5G58330.1 | CSA017616.1       | 2                        | 8      | 4.1666667   | E1.1.1.82; malate dehydrogenase (NADP+) [EC:1.1.1.82]                                        |
| PPC1       | AT1G53310.1 | CSA032885.1       | 1                        | 9      | 5           |                                                                                              |
| FDH        | AT5G14780.1 | CSA016186.1       | 2                        | 6      | 4.7619048   | FDH; formate dehydrogenase [EC:1.1.7.1.9]                                                    |
| AT4G37560  | AT4G37560.1 | CSA022831.1       | 1                        | 7      | 4.7619048   | E3.5.1.49; formamidase [EC:3.5.1.49]                                                         |
| P40        | AT1G72370.1 | CSA020098.1       | 2                        | 13     | 3.7333333   | RP-SAc; small subunit ribosomal protein SAe                                                  |
| AT4G18100  | AT4G18100.1 | CSA006911.1       | 1                        | 5      | 3.7333333   | RP-L32e; large subunit ribosomal protein L32e                                                |
| AT2G32060  | AT2G32060.1 | CSA030434.1       | 1                        | 6      | 3.7333333   | RP-S12e; small subunit ribosomal protein S12e                                                |
| AT2G09990  | AT2G09990.1 | CSA036240.1       | 2                        | 8      | 3.7333333   | RP-S16e; small subunit ribosomal protein S16e                                                |
| AT4G20980  | AT4G20980.1 | CSA019651.1       | 1                        | 4      | 4           | EIF3D; translation initiation factor 3 subunit D                                             |
| PP2AA2     | AT3G25800.1 | CSA019797.1       | 1                        | 4      | 4           | PPP2R1; serine/threonine-protein phosphatase 2A regulatory subunit A                         |
| UGP2       | AT5G17310.2 | CSA029743.1       | 1                        | 4      | 3           | UGP2; UTP--glucose-1-phosphate uridylyltransferase [EC:2.7.7.9]                              |
| UGE5       | AT4G10960.1 | CSA035914.1       | 1                        | 3      | 3           | galE; UDP-glucose 4-epimerase [EC:5.1.3.2]                                                   |
| USP        | AT5G52560.1 | CSA032553.1       | 1                        | 6      | 3           | USP; UDP-sugar pyrophosphorylase [EC:2.7.7.64]                                               |
| GME        | AT5G28840.1 | CSA034927.1       | 1                        | 3      | 3           | GME; GDP-D-mannose 3', 5'-epimerase [EC:5.1.3.18 5.1.3.-]                                    |
| Hsp81.4    | AT5G56000.1 | CSA013811.1       | 1                        | 5      | 3           | HSP90A; molecular chaperone HspG                                                             |
| cpHsc70-2  | AT5G49910.1 | CSA026073.1       | 1                        | 5      | 3           | HSPA1s; heat shock 70kDa protein 1/2/6/8                                                     |
| Cpn60beta2 | AT3G13470.1 | CSA036590.1       | 1                        | 3      | 3           | groEL; chaperonin GroEL                                                                      |
| HSP60      | AT3G23990.1 | CSA006518.1       | 2                        | 4      | 3           | groEL; chaperonin GroEL                                                                      |
| AT1G11860  | AT1G11860.1 | CSA019996.1       | 3                        | 17     | 5.4095238   | gcvT; aminomethyltransferase [EC:2.1.2.10]                                                   |
| SBPASE     | AT3G55800.1 | CSA034492.1       | 1                        | 18     | 6.4175824   | E3.1.3.37; sedoheptulose-bisphosphatase [EC:3.1.3.37]                                        |
| PGRL1A     | AT4G22890.1 | CSA005866.1       | 1                        | 7      | 5.7857143   |                                                                                              |
| AT2G32730  | AT2G32730.1 | CSA030920.1       | 1                        | 3      | 3           | PSMD1; 26S proteasome regulatory subunit N2                                                  |
| RPT1A      | AT1G53750.1 | CSA029580.1       | 1                        | 3      | 3           | PSMC2; 26S proteasome regulatory subunit T1                                                  |
| PAE2       | AT3G14290.1 | CSA034513.1       | 1                        | 3      | 3           | PSMA5; 20S proteasome subunit alpha 5 [EC:3.4.25.1]                                          |
| CAT        | AT4G35090.1 | CSA035408.1       | 2                        | 3      | 2           | katE; catalase [EC:1.11.1.6]                                                                 |
| ALDH7B4    | AT1G54100.1 | CSA030116.1       | 1                        | 4      | 2           | ALDH7A1; aldehyde dehydrogenase family 7 member A1 [EC:1.2.1.31 1.2.1.8 1.2.1.3]             |
| AT5G51970  | AT5G51970.1 | CSA031477.1       | 2                        | 3      | 2           |                                                                                              |
| AT1G09640  | AT1G09640.1 | CSA003232.1       | 1                        | 9      | 2.7         |                                                                                              |
| AT1G32470  | AT1G32470.1 | CSA029723.1       | 1                        | 22     | 5.2666667   | gcvH; glycine cleavage system H protein                                                      |
| RBCL       | ATCG00490.1 | CSA036938.1       | 3                        | 3      | 3           | rbcl; ribulose-bisphosphate carboxylase large chain [EC:4.1.1.39]                            |
| RBCS1A     | AT1G67090.1 | CSA004763.1       | 2                        | 10     | 6           | rbcs; ribulose-bisphosphate carboxylase small chain [EC:4.1.1.39]                            |
| emb2726    | AT4G29060.1 | CSA007724.1       | 1                        | 4      | 2.7         |                                                                                              |
| SHM1       | AT4G37930.1 | CSA025613.1       | 2                        | 24     | 4.3290043   | glyA; glycine hydroxymethyltransferase [EC:2.1.2.1]                                          |
| Atlg07940  | AT5G60390.1 | CSA001667.1       | 1                        | 4      | 3           | EEF1A; elongation factor 1-alpha                                                             |
| FBA2       | AT4G38970.1 | CSA009966.1       | 3                        | 22     | 4.2055336   | ALDO; fructose-bisphosphate aldolase, class I [EC:4.1.2.13]                                  |
| AT4G02450  | AT4G02450.1 | CSA008160.1       | 1                        | 1      | 0           |                                                                                              |
| RBCS1B     | AT5G38430.1 | CSA020587.1       | 1                        | 4      | 3           | rbcs; ribulose-bisphosphate carboxylase small chain [EC:4.1.1.39]                            |
| ATMS1      | AT5G17920.1 | CSA026696.1       | 1                        | 5      | 1.2         | metE; 5-methyltetrahydropteroyltriglutamate--homocysteine methyltransferase [EC:2.1.1.14]    |
| HOG1       | AT4G13940.1 | CSA031781.1       | 2                        | 3      | 2           | E3.3.1.1; adenosylhomocysteinase [EC:3.3.1.1]                                                |
| RABE1b     | AT4G20360.1 | CSA028748.1       | 2                        | 7      | 2.7         |                                                                                              |
| GLN1-1     | AT5G37600.1 | CSA010785.1       | 1                        | 9      | 6           | glnA; glutamine synthetase [EC:6.3.1.2]                                                      |
| ACO3       | AT2G05710.1 | CSA025704.1       | 1                        | 3      | 3           | ACO; aconitate hydratase [EC:4.2.1.3]                                                        |
| At5g06290  | AT5G06290.1 | CSA018288.1       | 1                        | 4      | 2           |                                                                                              |
| TRX-M4     | AT3G15360.1 | CSA011054.1       | 1                        | 4      | 1.4         |                                                                                              |
| SAM1       | AT1G02500.1 | CSA005033.1       | 1                        | 2      | 2           | metK; S-adenosylmethionine synthetase [EC:2.5.1.6]                                           |
| AT1G67280  | AT1G67280.1 | CSA026411.1       | 1                        | 2      | 2           |                                                                                              |
| PSBP-1     | AT1G06680.1 | CSA033259.1       | 1                        | 19     | 6.7058824   | psbP; photosystem II oxygen-evolving enhancer protein 2                                      |
| LOS1       | AT1G56070.1 | CSA011928.1       | 1                        | 8      | 2           |                                                                                              |
| GLX1       | AT1G11840.6 | CSA011363.1       | 1                        | 2      | 2           | GLO1; lactoylglutathione lyase [EC:4.4.1.5]                                                  |
| AT4G13780  | AT4G13780.1 | CSA023566.1       | 1                        | 4      | 0.4         | MARS; methionyl-tRNA synthetase [EC:6.1.1.10]                                                |
| AT2G47640  | AT3G62840.1 | CSA023611.1       | 1                        | 3      | 0.5         | SNRPD2; small nuclear ribonucleoprotein D2                                                   |
| ROC3       | AT2G16600.1 | CSA002602.1       | 1                        | 1      | 0           |                                                                                              |
| CDSP32     | AT1G76080.1 | CSA008457.1       | 1                        | 2      | 0.6666667   |                                                                                              |
| CI51       | AT5G08530.1 | CSA015823.1       | 1                        | 6      | 1.0666667   | NDUFV1; NADH dehydrogenase (ubiquinone) flavoprotein 1 [EC:1.6.5.3 1.6.99.3]                 |
| FBA6       | AT2G36460.1 | CSA035207.1       | 1                        | 4      | 3           | ALDO; fructose-bisphosphate aldolase, class I [EC:4.1.2.13]                                  |
| GSTF8      | AT2G47730.1 | CSA030616.1       | 2                        | 1      | 0           | GST; glutathione S-transferase [EC:2.5.1.18]                                                 |
| MDAR1      | AT3G52880.2 | CSA027795.1       | 1                        | 2      | 0.6666667   | E1.6.5.4; monodehydroascorbate reductase (NADH) [EC:1.6.5.4]                                 |
| APX1       | AT1G07890.1 | CSA018282.1       | 1                        | 1      | 0           | E1.11.1.11; L-ascorbate peroxidase [EC:1.11.1.11]                                            |
| SUS3       | AT4G02280.1 | CSA034422.1       | 1                        | 1      | 0           | E2.4.1.13; sucrose synthase [EC:2.4.1.13]                                                    |
| RGP3       | AT3G08900.1 | CSA007312.1       | 1                        | 1      | 0           | RGP; reversibly glycosylated polypeptide / UDP-arabinopyranose mutase [EC:2.4.1.- 5.4.99.30] |
| RGP1       | AT3G02230.1 | CSA017438.1       | 1                        | 1      | 0           | RGP; reversibly glycosylated polypeptide / UDP-arabinopyranose mutase [EC:2.4.1.- 5.4.99.30] |
| PB         | ATCG00480.1 | CSA036932.1       | 1                        | 5      | 2           |                                                                                              |
| AVP1       | AT1G15690.1 | CSA000036.1       | 1                        | 2      | 0.6666667   | ppa; inorganic pyrophosphatase [EC:3.6.1.1]                                                  |
| AT5G08680  | AT5G08680.1 | CSA033994.1       | 1                        | 5      | 2           | ATPeF1B; F-type H+-transporting ATPase subunit beta [EC:3.6.3.14]                            |
| UXS6       | AT2G28760.1 | CSA031127.1       | 1                        | 1      | 0           | UXS1; UDP-glucuronate decarboxylase [EC:4.1.1.35]                                            |
| TCP-1      | AT3G20050.1 | CSA035465.1       | 1                        | 5      | 1.2         |                                                                                              |
| CLPC1      | AT5G50920.1 | CSA016043.1       | 1                        | 2      | 0.6666667   | clpC; ATP-dependent Clp protease ATP-binding subunit ClpC                                    |
| AT1G51980  | AT1G51980.1 | CSA009282.1       | 1                        | 3      | 1.6666667   |                                                                                              |
| PKT3       | AT2G33150.1 | CSA035327.1       | 1                        | 2      | 2           | ACAA1; acetyl-CoA acyltransferase 1 [EC:2.3.1.16]                                            |
| DELTA-OAT  | AT5G46180.1 | CSA028285.1       | 1                        | 2      | 0.6666667   | rocD; ornithine--oxo-acid transaminase [EC:2.6.1.13]                                         |
| AT3G58610  | AT3G58610.1 | CSA003086.1       | 1                        | 2      | 2           | ilvC; ketol-acid reductoisomerase [EC:1.1.1.86]                                              |
| ABA1       | AT5G67030.1 | CSA014226.1       | 1                        | 3      | 0.5         | ZEP; zeaxanthin epoxidase [EC:1.14.15.21]                                                    |
| STN7       | AT1G68830.1 | CSA015987.1       | 1                        | 1      | 0           |                                                                                              |
| AT5G26830  | AT5G26830.1 | CSA018664.1       | 1                        | 4      | 0.4         |                                                                                              |
| CA1        | AT3G01500.2 | CSA002108.1       | 1                        | 5      | 3           | cynT; carbonic anhydrase [EC:4.2.1.1]                                                        |
| DAP        | AT4G33680.1 | CSA004187.1       | 1                        | 2      | 0.6666667   | E2.6.1.83; LL-diaminopimelate aminotransferase [EC:2.6.1.83]                                 |
| AT2G42220  | AT2G42220.1 | CSA003818.1       | 1                        | 6      | 3.4285714   |                                                                                              |
| LAP2       | AT4G30920.1 | CSA005660.1       | 1                        | 3      | 3           | CARP; leucyl aminopeptidase [EC:3.4.11.1]                                                    |
| IIL1       | AT4G13430.1 | CSA008456.1       | 1                        | 3      | 3           |                                                                                              |
| AT4G13010  | AT4G13010.1 | CSA001213.1       | 1                        | 1      | 0           |                                                                                              |
| SULA       | AT2G21280.1 | CSA021957.1       | 1                        | 3      | 3           |                                                                                              |
| AT1G29880  | AT1G29880.1 | CSA008625.1       | 1                        | 2      | 0.6666667   |                                                                                              |
| AT4G10300  | AT4G10300.1 | CSA004535.1       | 1                        | 1      | 0           |                                                                                              |
| XK-2       | AT5G49650.1 | CSA022347.1       | 1                        | 1      | 0           | xyfB; xylokulase [EC:2.7.1.17]                                                               |
| AQI        | AT4G38220.2 | CSA003990.1       | 1                        | 1      | 0           | ACY1; aminoacylase [EC:3.5.1.14]                                                             |
